1 **Genome-Wide Association Studies of Coffee Intake in UK/US Participants of European**  
2 **Ancestry Uncover Gene-Cohort Influences**

3 Hayley H A Thorpe<sup>1,2</sup>, Pierre Fontanillas<sup>3</sup>, Benjamin K Pham<sup>4</sup>, John J Meredith<sup>4</sup>, Mariela V  
4 Jennings<sup>4</sup>, Natasia S Courchesne-Krak<sup>4</sup>, Laura Vilar-Ribó<sup>5</sup>, Sevim B Bianchi<sup>4</sup>, Julian Mutz<sup>6</sup>,  
5 23andMe Research Team<sup>2</sup>, Sarah L Elson<sup>2</sup>, Jibrán Y Khokhar<sup>1,2</sup>, Abdel Abdellaoui<sup>7</sup>, Lea K  
6 Davis<sup>8,9,10</sup>, Abraham A Palmer<sup>4,11</sup>, & Sandra Sanchez-Roige<sup>4,9</sup>

7 <sup>1</sup>Department of Anatomy and Cell Biology, Schulich School of Medicine and Dentistry, Western  
8 University, London, ON, Canada.

9 <sup>2</sup>Department of Biomedical Sciences, Ontario Veterinary College, University of Guelph, Guelph,  
10 ON, Canada

11 <sup>3</sup>23andMe, Inc., Sunnyvale, CA, USA

12 <sup>4</sup>Department of Psychiatry, University of California San Diego, La Jolla, CA, USA

13 <sup>5</sup>Psychiatric Genetics Unit, Group of Psychiatry, Mental Health and Addiction, Vall d'Hebron  
14 Research Institute (VHIR), Universitat Autònoma de Barcelona, Barcelona, Spain

15 <sup>6</sup>Social, Genetic and Developmental Psychiatry Centre, Institute of Psychiatry, Psychology &  
16 Neuroscience, King's College London, London, UK

17 <sup>7</sup>Department of Psychiatry, Amsterdam UMC, University of Amsterdam, Amsterdam, The  
18 Netherlands

19 <sup>8</sup>Department of Biomedical Informatics, Vanderbilt University Medical Center, Nashville, TN,  
20 USA

21 <sup>9</sup>Department of Medicine, Vanderbilt University Medical Center, Nashville, TN, USA

22 <sup>10</sup>Department of Psychiatry and Behavioral Sciences, Vanderbilt University Medical Center,  
23 Nashville, TN, USA

24 <sup>11</sup>Institute for Genomic Medicine, University of California San Diego, La Jolla, CA, USA

25     **Corresponding author:** Sandra Sanchez-Roige, PhD, Department of Psychiatry, University of  
26                   California San Diego, San Diego, CA, USA. Email: [sanchezroige@ucsd.edu](mailto:sanchezroige@ucsd.edu)  
27

28 **Abstract**

29 Coffee is one of the most widely consumed beverages. We performed a genome-wide  
30 association study (**GWAS**) of coffee intake in US-based 23andMe participants ( $N=130,153$ ) and  
31 identified 7 significant loci, with many replicating in three multi-ancestral cohorts. We examined  
32 genetic correlations and performed a phenome-wide association study across thousands of  
33 biomarkers and health and lifestyle traits, then compared our results to the largest available  
34 GWAS of coffee intake from UK Biobank (UKB;  $N=334,659$ ). The results of these two GWAS were  
35 highly discrepant. We observed positive genetic correlations between coffee intake and  
36 psychiatric illnesses, pain, and gastrointestinal traits in 23andMe that were absent or negative in  
37 UKB. Genetic correlations with cognition were negative in 23andMe but positive in UKB. The only  
38 consistent observations were positive genetic correlations with substance use and obesity. Our  
39 study shows that GWAS in different cohorts could capture cultural differences in the relationship  
40 between behavior and genetics.

## 41 Introduction

42 Coffee is a leading global food commodity that has psychoactive properties that are largely  
43 due to the presence of caffeine<sup>1</sup>. While rates of use and daily intake varies widely by geographic  
44 region, it is estimated that approximately 60-85% of adults in Europe and the United States  
45 consume between 0.6 to 5.5 cups of coffee daily<sup>2-4</sup>. Intake of coffee and its bioactive constituents  
46 is associated with benefits on cognitive function<sup>5</sup> and lower risk of liver disease<sup>6,7</sup> (but see<sup>8</sup>),  
47 Parkinson's and other neurodegenerative diseases<sup>6,7,9</sup>, cardiovascular disease<sup>6,7</sup>, type II  
48 diabetes<sup>6,7</sup>, and certain cancers<sup>6,7,10</sup>. However, coffee intake is also associated with higher risks  
49 for some adverse outcomes, including increased risk of other substance use and misuse<sup>11-14</sup>,  
50 some cancers (e.g., lung cancer<sup>7,10,15</sup>), poor lipid profile<sup>6,7</sup>, pregnancy loss<sup>6,7</sup>, gastrointestinal  
51 maladies<sup>16</sup>, and worse cardiovascular outcomes following excessive intake<sup>17</sup>. Given the  
52 widespread and regular intake of coffee across the globe, addressing the full spectrum of  
53 correlations with health and disease is an important but challenging task.

54 Genetic studies offer a compelling avenue to investigate the relationships between coffee  
55 intake and other complex traits. Twin studies that calculate genetic contributions to daily coffee  
56 intake estimate it to be 36-56% heritable, suggesting that coffee intake should be amenable to  
57 genetic analysis. Whereas phenotypic correlations, which depend on measuring two or more traits  
58 in the same cohort, can arise from genetic and environmental factors, genetic correlations assess  
59 genetically driven relationships using the results from genome-wide association studies (**GWAS**)  
60 and can therefore examine correlations between two or more traits, even if they were measured  
61 in entirely non-overlapping cohorts. In the past decade, over a dozen GWAS ( $N=1,207-407,072$ )  
62 have examined coffee intake<sup>18-34</sup>. Several of these GWAS have found associations with single  
63 nucleotide polymorphisms (**SNPs**) within or near genes that metabolize caffeine (**Supplementary**  
64 **Table 1**), such as *CYP1A1* and *CYP1A2*<sup>18-20,23-26,30,32,33</sup>. Some of these loci are also associated  
65 with other complex traits, including liver disease<sup>35-37</sup>, cancers<sup>38-41</sup>, and alcohol consumption<sup>42-44</sup>.

66 This pleiotropy could suggest that these other associations are mediated by coffee intake or that  
67 these loci also influence these traits via alternative independent mechanisms. Genetic  
68 correlations have also been reported between coffee intake with other substance use<sup>45,46</sup>, reduced  
69 gray matter volumes<sup>18</sup>, psychiatric illness<sup>45</sup>, osteoarthritis<sup>47</sup>, sleep<sup>48</sup>, body mass index (**BMI**)<sup>49</sup>,  
70 type II diabetes<sup>49</sup>, and migraine<sup>50</sup>. However, some genetic correlations were conducted under a  
71 *priori* justification (e.g., other substance use traits, sleep) and as such may fail to capture the full  
72 scope of genetic correlations between coffee with other traits. Thus, a data-driven examination of  
73 trait associations with coffee intake remains unexplored.

74 While coffee is the primary source of caffeine for many, other common dietary sources of  
75 caffeine include tea, soft drinks, and chocolate. Consequently, when we refer to coffee intake, we  
76 mean explicit measures of coffee intake (e.g., measured as cups/day) and not caffeine intake  
77 unless otherwise specified. Intake of other caffeine sources also varies by geographic region  
78 based on beverage sales<sup>2</sup>. For example, tea (rather than coffee) is the preferred source of caffeine  
79 in the United Kingdom (UK; tea vs. coffee: ~50% vs. 20%) compared to the United States (US;  
80 ~10% vs. 30%)<sup>2</sup>. As some genetic studies used data from the UK Biobank (**UKB**) only<sup>18,47,48,51-53</sup>  
81 or combined cohorts across regions with different patterns of caffeinated beverage intake  
82 (**Supplementary Table 1**)<sup>32,33,46</sup>, this distinction may limit generalizability or introduce  
83 environmental and cultural confounds that affect the genetic associations between coffee intake  
84 and other traits.

85 In this study, we used survey responses from US-based 23andMe, Inc. research  
86 participants of European ancestry ( $N=130,153$ ) and performed a GWAS of a single item “How  
87 many 5-ounce (cup-sized) servings of caffeinated coffee do you consume each day?”. Using  
88 genetic correlations and phenome- and laboratory-wide association studies (**PheWAS**,  
89 **LabWAS**), we explored the relationships between coffee intake and thousands of biomarkers,  
90 health features, and lifestyle traits to provide a fuller inventory of genetic correlations with coffee

91 intake. We compared our findings from the 23andMe cohort to those from the UKB using publicly  
92 available GWAS summary statistics of coffee intake (“How many cups of coffee do you drink each  
93 day? (Include decaffeinated coffee)”,  $N=334,659$ , <http://www.nealelab.is/uk-biobank/>). Although  
94 we had originally intended to perform a meta-analysis, our results revealed a lower-than-expected  
95 genetic correlation between coffee intake in the two cohorts; therefore, we instead used these  
96 datasets to explore cohort differences in coffee intake across these two distinct populations.

## 97 **Results**

### 98 **GWAS in the 23andMe US-based cohort replicated seven loci implicated in coffee intake**

99 Participant demographics of the 23andMe cohort are described in **Supplementary Table**  
100 **2**. The cohort was 65% male, had a mean age of  $52.8 \pm 16.9$  years old, and an average BMI of  
101  $28.38 \pm 6.54$  (range: 14.0-69.1), similar to the US average of 27.5 (95% CI: 25.5-29.4)<sup>54</sup>. The  
102 average coffee intake in the cohort was  $1.98 (\pm 2.35 \text{ SD})$  cups per day, similar to the coffee intake  
103 distributions in UKB ( $2.14 \pm 2.09 \text{ SD}$ ; see **Supplementary Figure 1** and **Supplementary Table**  
104 **3** for distributions).

105 We conducted a GWAS of 14,274,006 imputed genetic variants assuming an additive  
106 genetic model that included age, sex, the first five genetic principal components, and indicator  
107 variables for genotype platforms as covariates (**Supplementary Table 4; Supplementary**  
108 **Material** for additional genotyping and GWAS details). The genomic control inflation factor of the  
109 GWAS was  $\lambda=1.09$ , suggesting no substantial inflation due to population stratification. SNP-  
110 heritability of coffee intake via Linkage Disequilibrium score regression (**LDSC**) was  $7.57\% \pm 0.59$   
111 (**Supplementary Table 5**).

112 We identified seven genome-wide significant ( $p < 5.00E-08$ ) independent ( $r^2 < 0.1$ ) loci that  
113 were associated with coffee intake (**Figure 1, Table 1; Supplementary Figures 2-8** for locus  
114 zoom plots). These associations replicated prior coffee or caffeine GWAS findings

115 **(Supplementary Table 6)**. For example, rs2472297 ( $p=3.60E-65$ , chr15q24.1) is in the intergenic  
116 region between *CYP1A1* and *CYP1A2*, and has been previously associated with coffee and  
117 caffeine intake<sup>18,20,24,26,28,30,32,33,55</sup>. *CYP1A1* and *CYP1A2* encode members of the cryptochrome  
118 P450 superfamily of enzymes involved in xenobiotic metabolism<sup>22</sup>. rs2472297 has also been  
119 previously associated with traits like alcohol consumption<sup>56,57</sup>, clozapine pharmacokinetics<sup>58</sup>,  
120 kidney function<sup>59-62</sup>, and the concentration of biomarkers in urine<sup>63-68</sup>. We also identified  
121 rs4410790 ( $p=5.20E-55$ , chr7p21.1), which is located upstream of the *AHR* gene encoding a  
122 transcription factor that regulates *CYP1A1/CYP1A2* and is activated by polycyclic aromatic  
123 hydrocarbons, which are present in coffee<sup>22,69</sup>. Prior studies associated rs4410790 and caffeine  
124 intake from tea<sup>20</sup>, as well as with traits like caffeine metabolism<sup>28</sup>, bitter beverage intake<sup>26</sup>, and  
125 urine biomarkers<sup>64,66-68,70</sup>. Lastly, rs199612805 ( $p=1.80E-10$ , chr22q11.23), which is located near  
126 *ADORA2A*, was also implicated in coffee intake. This variant was recently associated with  
127 caffeine intake from tea and coffee in the UKB<sup>20</sup>. *ADORA2A* encodes an adenosine G-protein  
128 coupled receptor that is inhibited by caffeine to produce stimulating effects<sup>71</sup>. The remaining four  
129 SNPs – rs34645063, rs28634426, rs117824460, and rs11474881 – were in linkage disequilibrium  
130 (LD) with SNPs previously identified by other coffee or caffeine GWAS<sup>18,20,24,26,28,30,55</sup>. rs34645063  
131 ( $p=3.30E-09$ , chr6q16.1) is a deletion/insertion polymorphism between *MMS22L* and *POU3F2*.  
132 rs34645063 is in LD ( $R^2=0.74$ ) with rs754177720 and is also associated with caffeine intake from  
133 coffee or tea<sup>20</sup>. rs28634426 ( $p=2.10E-10$ , chr7q11.23) is an intronic variant of *STYXL1* in LD with  
134 rs17685 ( $R^2=0.78$ ) and rs1057868 ( $R^2=0.76$ ), which were previously implicated by coffee  
135 GWAS<sup>18,20,24,26,30,55</sup>. rs117824460 ( $p=1.70E-08$ , chr19q13.2) is an intronic variant of *CYP2A6*, and  
136 is in LD ( $R^2=0.05$ ) with rs56113850, which was implicated in coffee intake<sup>20,26</sup> and caffeine  
137 metabolism<sup>28</sup>. *CYP2A6* encodes a cryptochrome P450 superfamily enzyme member that  
138 metabolizes nicotine<sup>72</sup>; rs117824460 has also been associated with smoking traits<sup>57,73</sup> and serum  
139 albumin<sup>74</sup>, C-reactive protein<sup>75</sup>, and liver alkaline phosphatase levels<sup>66</sup>. The final significant  
140 variant we identified, rs11474881 (chr20q13.33,  $p=1.10E-08$ ), is an intronic variant of the

141 *PCMTD2* gene; rs11474881 is in LD ( $R^2=0.98$ ) with rs6062679, which was previously implicated  
142 in coffee and tea intake and bitter beverage consumption<sup>26</sup>. We used three additional multi-  
143 ancestral cohorts to replicate these findings (**Table 1; Supplementary Table 3**). Of the SNPs that  
144 passed QC, all replicated in a larger sample of 23andMe research participants of European  
145 ancestry ( $N=689,661$ ), all replicated in those with African American ancestry ( $N=32,312$ ), and one  
146 replicated in those of Latin American ancestry ( $N=124,155$ ).

147 We also report several notable nominal associations with coffee intake ( $p<1.00E-06$ ,  
148 **Supplementary Table 6**). rs72790130 ( $p=5.50E-08$ , chr16q23.3) and rs2155645 ( $p=9.80E-07$ ,  
149 chr11q23.2) are intronic variants of two cell adhesion molecule genes, *CDH13* and *NCAM1*,  
150 respectively. Both genes have been previously implicated in substance use traits by other  
151 GWAS<sup>20,57,76-82</sup> and candidate gene studies in humans and animal models<sup>83-88</sup>. rs2155645 is also  
152 in LD with rs2298527 ( $R^2=0.43$ ), which was previously implicated in daily caffeine intake from  
153 coffee<sup>20</sup>. rs11204734 ( $p=2.90E-07$ , chr1q21.3) is an intronic variant of *ARNT*; its protein  
154 heterodimerizes with *AHR* and binds to xenobiotic response elements to regulate transcription of  
155 *CYP1A1* and *CYP1A2*<sup>22</sup>. Finally, rs340019 ( $p=2.10E-07$ , chr15q22.2) is an intronic variant of  
156 *RORA*, which is involved in circadian rhythm and metabolic regulation, among other functions<sup>89</sup>.  
157 rs340019 is in LD with rs12591786 ( $R^2=0.25$ ), which was implicated in daily caffeine intake from  
158 cups of coffee and tea<sup>20</sup>.



159 **Table 1.** Significant ( $p < 5.00E-08$ ) GWAS results for coffee intake from 23andMe research participants ( $N=130,153$ ) of European  
160 ancestry (**EA**). Replication (**EA Rep**) was conducted in an additional cohort of 23andMe participants of EA ( $N=689,661$ ), and in those  
161 with African American ancestry (**AA**;  $N=32,312$ ) and Latin American ancestry (**LA**;  $N=124,155$ ); \*SNPs that did not pass QC in  
162 replication. See **Supplementary Table 6** for additional information.

| SNP         | BP       | Alleles | Cytoband    | $p$ value | EA EAF | Effect | EA Rep $p$ value | EA Rep EAF | AA $p$ value | AA EAF | LA $p$ value | LA EAF | Nearest gene(s) |
|-------------|----------|---------|-------------|-----------|--------|--------|------------------|------------|--------------|--------|--------------|--------|-----------------|
| rs2472297   | 75027880 | C/T     | chr15q24.1  | 3.60E-65  | 0.23   | 0.08   | 1.28E-234*       | 0.24       | 3.09E-05     | 0.07   | 5.47E-47*    | 0.14   | CYP1A1, CYP1A2  |
| rs4410790   | 17284577 | C/T     | chr7p21.1   | 5.20E-55  | 0.38   | -0.06  | 7.58E-212*       | 0.38       | 4.52E-15     | 0.52   | 9.89E-60*    | 0.55   | AGR3, AHR       |
| rs199612805 | 24843991 | D/I     | chr22q11.23 | 1.80E-10  | 0.01   | -0.10  | 2.48E-29         | 0.015      | 1.28E-07     | 0.08   | 6.32E-13     | 0.02   | ADORA2A, UPB1   |
| rs28634426  | 75675594 | G/T     | chr7q11.23  | 2.10E-10  | 0.20   | 0.03   | 3.08E-16         | 0.24       | 0.08         | 0.32   | 8.17E-06     | 0.27   | STYXL1          |

|                 |              |     |                 |              |      |       |          |      |      |          |           |          |                                |
|-----------------|--------------|-----|-----------------|--------------|------|-------|----------|------|------|----------|-----------|----------|--------------------------------|
| rs34645063      | 9859107<br>5 | D/I | chr6q16.1       | 3.30E<br>-09 | 0.47 | -0.02 | 5.23E-16 | 0.48 | 0.05 | 0.6<br>5 | 4.35E-06* | 0.5<br>8 | <i>MMS22L,<br/>POU3F2</i>      |
| rs11474881      | 6289295<br>6 | D/I | chr20q13.3<br>3 | 1.10E<br>-08 | 0.55 | -0.02 | 2.36E-12 | 0.55 | .21  | 0.4<br>5 | 0.02*     | 0.6<br>2 | <i>PCMTD2</i>                  |
| rs11782446<br>0 | 4137148<br>0 | A/G | chr19q13.2      | 1.70E<br>-08 | 0.03 | -0.06 | 2.00e-07 | 0.03 | 0.08 | 0.0<br>1 | 0.08      | 0.0<br>2 | <i>CTC-<br/>490E21.1<br/>2</i> |

163

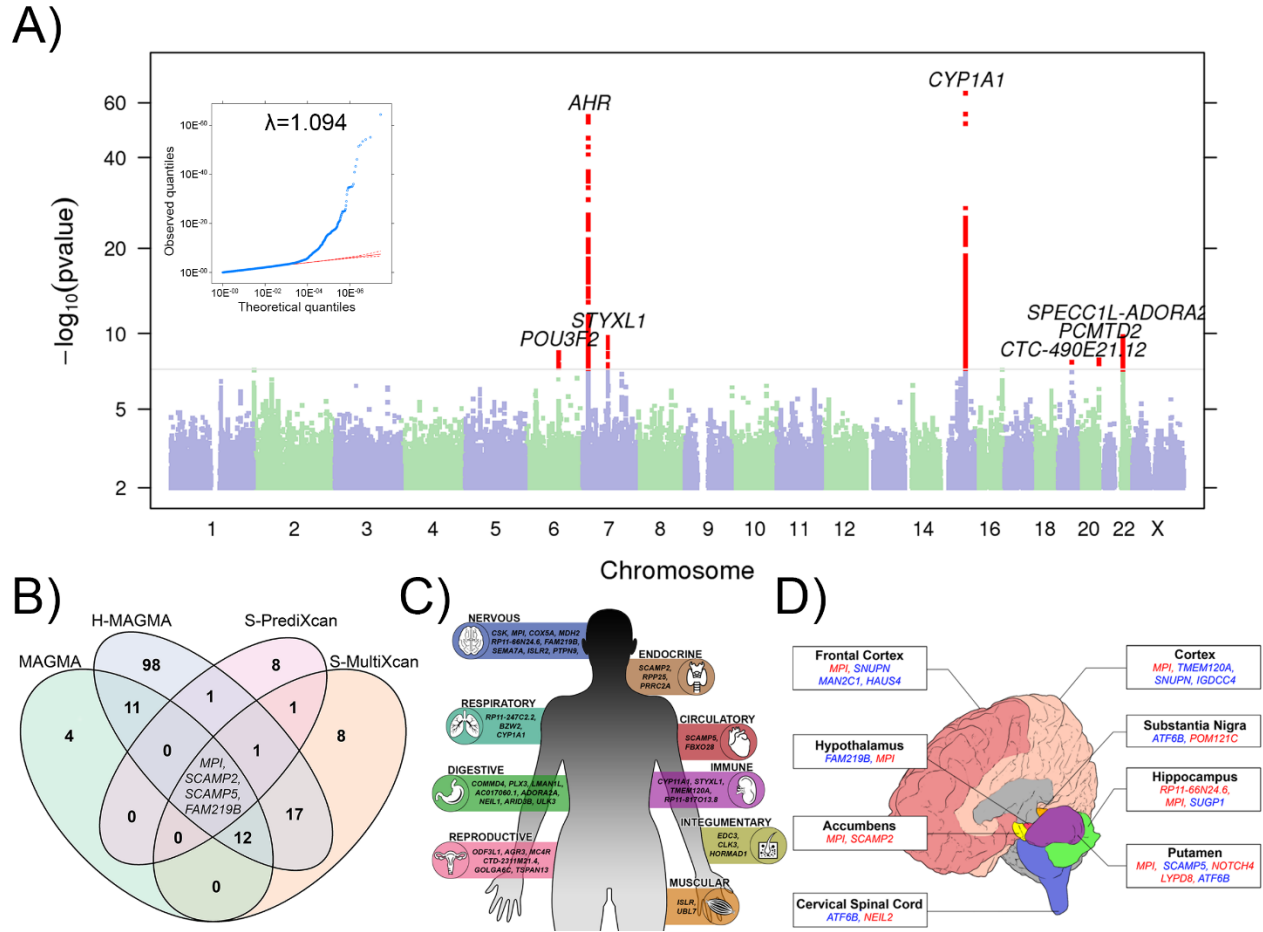

164

165 **Figure 1. GWAS and secondary analyses of coffee intake from the 23andMe cohort. A)**  
 166 **Manhattan plot displays seven genome-wide significant loci for coffee intake in the 23andMe**  
 167 **cohort ( $N=130,153$ ). The horizontal line represents the threshold for significance ( $p=5.00E-08$ ).**  
 168 **Nearest protein-coding genes ( $<1\text{Mb}$ ) to significant loci are labeled. Quantile-quantile plot shown**  
 169 **in upper left corner. For more details, see **Table 1** and **Supplementary Table 6.** B) **Overlap of**  
 170 **genes identified by MAGMA, H-MAGMA, S-PrediXcan, and S-MultiXcan. Genes identified by all**  
 171 **four methods are displayed. C) **Genes predicted to affect coffee intake identified by S-MultiXcan**  
 172 **according to the most significantly associated biological systems. For more details, see**  
 173 **Supplementary Table 9. D) **Genes implicated in coffee intake by S-PrediXcan according to brain**  
 174 **regions. Upregulated genes are shown in red, downregulated shown in blue. For more detail, see**  
 175 **Supplementary Table 10.********

176 **Gene-based and tissue enrichment analyses suggest coffee intake is primarily**  
177 **associated with gene expression in the brain**

178 We used gene- and transcriptome-based analyses (MAGMA, H-MAGMA, S-MultiXcan/S-  
179 PrediXcan) and identified 165 target candidate genes that may be most relevant to coffee intake.  
180 MAGMA identified 31 genes implicated in coffee intake in physical proximity to GWAS loci  
181 (**Supplementary Table 7**). H-MAGMA, which maps SNPs to genes via chromatin interaction from  
182 human brain tissue, implicated 143 unique gene-tissue pairs showing expression specific to cell  
183 type (75.16% neuron [31.30% cortical neuron, 33.04% iPSC derived neurons; 35.65% midbrain  
184 dopamine neurons], 24.83% astrocyte) and developmental (48.00% fetal, 52.00% adult)  
185 (**Supplementary Table 8**). Finally, S-MultiXcan predicted significant transcriptional regulation of  
186 40 genes implicated in coffee intake dispersed across 20 tissues (**Figure 1C; Supplementary**  
187 **Table 10**). Of the top biological systems implicated by S-MultiXcan, nine were attributed to the  
188 nervous system (brain  $N=5$ ; tibial nerve  $N=4$ ), eight to the digestive system (esophagus  $N=6$ ;  
189 pancreas  $N=1$ ; small intestine  $N=1$ ), and six to the reproductive system (testis  $N=4$ ; prostate  $N=2$ ;  
190 **Figure 1C**). Fifty percent of these genes were predicted to be downregulated in the digestive and  
191 reproductive systems, whereas 66.67% of nervous system genes were predicted to be  
192 upregulated. Cortical enrichment was further supported by S-PrediXcan (**Figure 1D**), showing  
193 that SNPs associated with coffee intake most frequently correlated with predicted gene  
194 expression in overall cortical and frontal cortical regions ( $N=4$ /tissue), as well as the putamen  
195 ( $N=5$ ). Overall, four genes (*SCAMP2*, *SCAMP5*, *MPI*, and *FAM219B*) were identified by all four  
196 methods, and six of the 165 discovered genes (*FBXO28*, *NEIL2*, *HAUS4*, *IGDCC4*, *RP11-*  
197 *298/3.5*, *RP11-298/3.5*) were not within 1Mb of SNPs identified by prior GWAS of coffee or  
198 caffeine traits (**Supplementary Table 11; Figure 1B; Table 2**). These novel genes have been  
199 associated with substance use (e.g., *HAUS4* and smoking initiation<sup>73</sup>), educational outcomes

200 (e.g., *HAUS4* and educational attainment<sup>90</sup>), and biomarkers (e.g., *FBXO28* and mean platelet  
201 volume<sup>91</sup>; *IGDCC4* and mean corpuscular volume<sup>92</sup>).

202 Next, we used MAGMA gene-set analysis to identify biological pathways that may be most  
203 strongly associated with coffee intake. This analysis revealed significant enrichment ( $p=4.75E-$   
204  $07$ ) in pathways related to the metabolism of xenobiotics or foreign substances (i.e., chemicals)  
205 (**Supplementary Table 12**).

206 MAGMA tissue-based enrichment analyses suggested that coffee intake was only  
207 significantly associated with brain tissue (**Supplementary Figure 9A**). More specifically,  
208 differential expression by coffee intake was enriched ( $p<9.25E-04$ ) in the frontal cortex, overall  
209 cortex, cerebellum, and cerebellar hemispheres (**Supplementary Figure 9B**; **Supplementary**  
210 **Table 12**), consistent with the S-PrediXcan findings (**Supplementary Table 9**).

211 **Genetic correlation and polygenic score analyses of coffee intake in US- and UK-based**  
212 **cohorts reveal discrepant associations with health and psychiatric traits, but consistent**  
213 **positive associations with substance use and obesity**

214 To boost statistical power and identify novel genes associated with coffee intake, we  
215 sought to meta-analyze our data (**metaGWAS**) with those from the UKB using METAL<sup>93</sup>. As a  
216 preliminary step to determine the appropriateness of a meta-analysis, we examined the genetic  
217 correlation between coffee intake in the 23andMe and UKB cohorts. Surprisingly, the two datasets  
218 were only moderately correlated ( $r_g=0.63$ ,  $p=3.54E-43$ ), although all top loci ( $p<5.0E-05$ ) shared  
219 direction of effect and had similar effect strengths (**Supplementary Figure 10**). In addition, the  
220 estimated LDSC  $SNP_{h^2}$  heritability of coffee intake of our metaGWAS was slightly lower than for  
221 both the univariate GWAS (metaGWAS  $SNP_{h^2}=4.09\% \pm 0.26$  vs. 23andMe  $SNP_{h^2}=7.57\% \pm 0.59$   
222 vs. UKB  $SNP_{h^2}=4.85\% \pm 0.33$ ; **Supplementary Table 5**). We interpreted these results as an

223 indication of cohort heterogeneity and proceeded to analyze genetic associations with coffee  
224 intake in each cohort independently.

It is made available under a [CC-BY-ND 4.0 International license](https://creativecommons.org/licenses/by-nd/4.0/).

A)

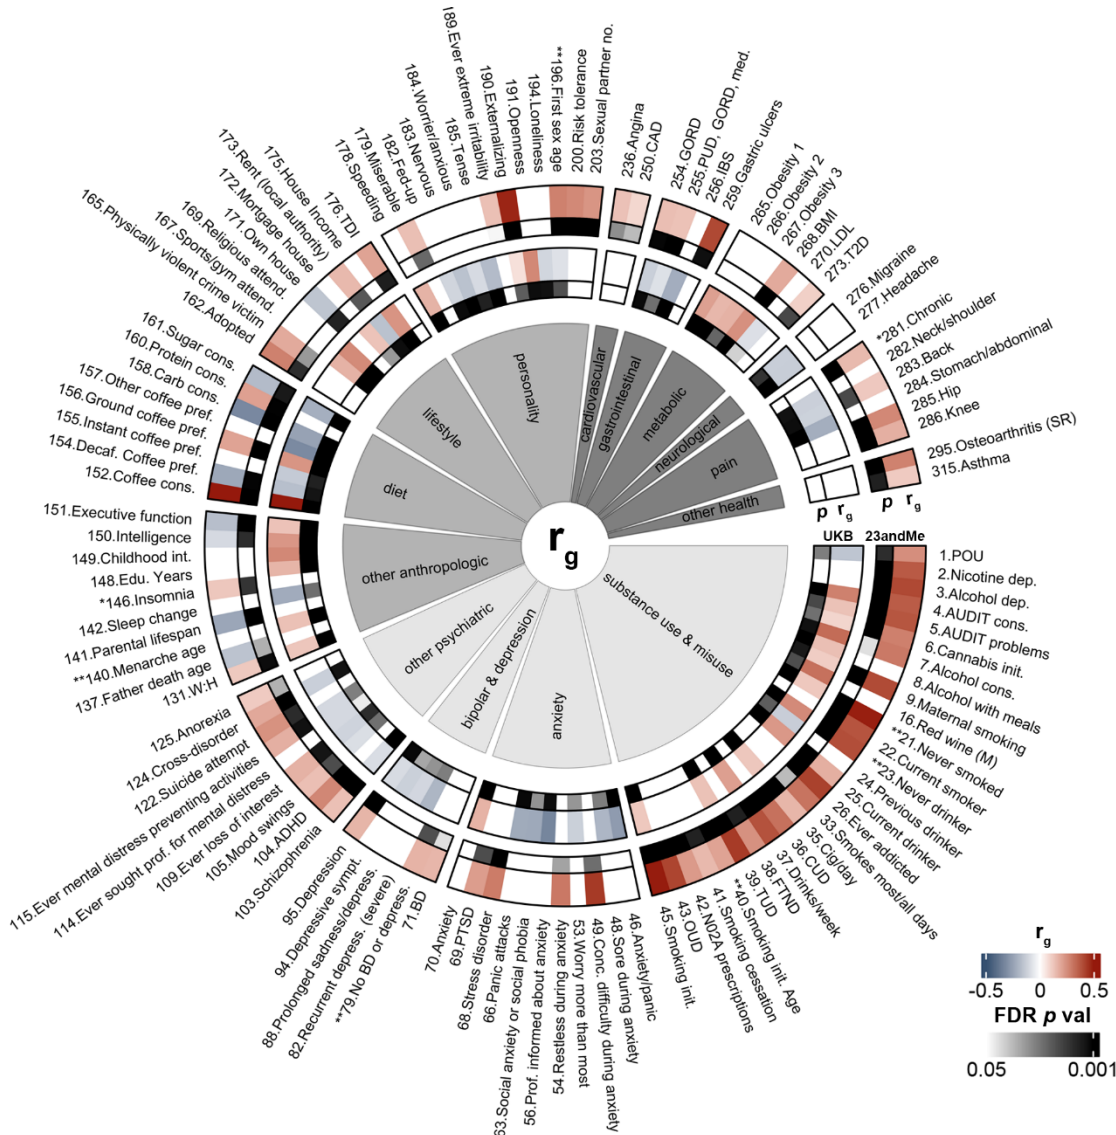

B)

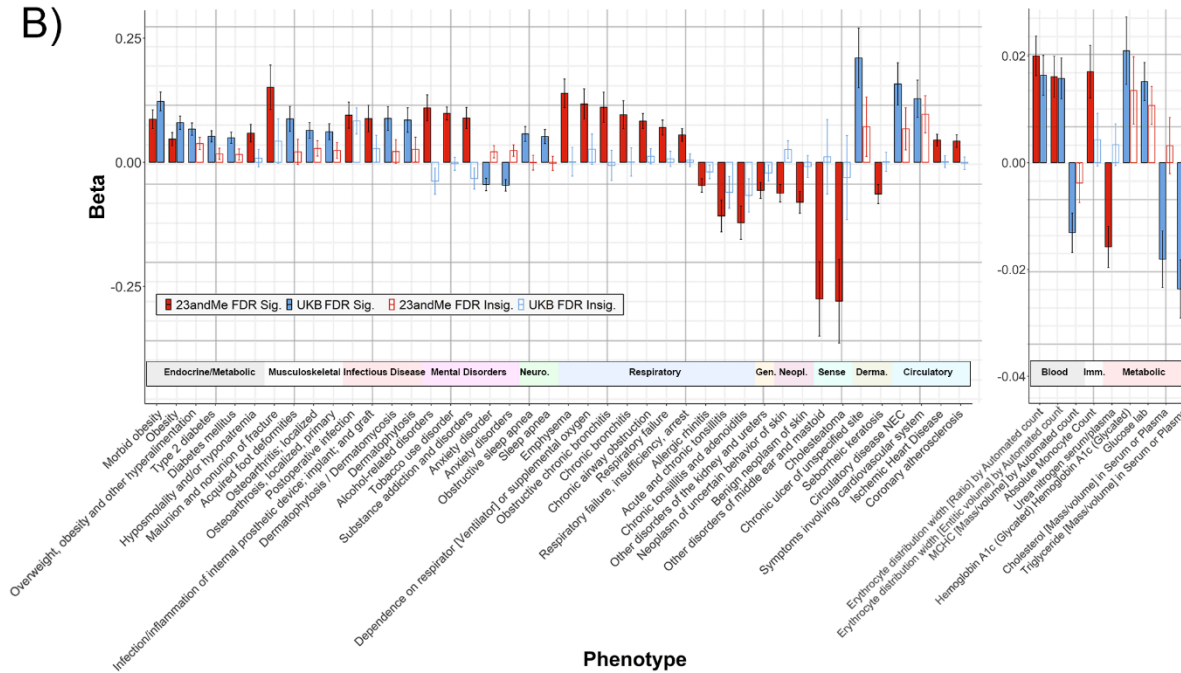

226 **Figure 2. Discordant genetic and phenotypic associations with genetic disposition to**  
227 **coffee intake in US and UK cohorts. A)** Comparison of genetic correlations across psychiatric  
228 (light gray), anthropologic (medium gray), and health (dark gray) traits between 23andMe (lanes  
229 1 and 2) and UKB (lanes 3 and 4). Lanes 1 and 3 show  $r_g$  values calculated by LDSC, and lanes  
230 2 and 4 show FDR-corrected  $p$  values. Only traits for which at least one cohort was FDR-  
231 significant are displayed. For a full list of correlations and trait names, see **Supplementary Table**  
232 **14**. Most signals persisted after conditioning for dietary sugar, cigarettes per day, and Alcohol  
233 Use Disorder Identification (**AUDIT**) Consumption scores using mtCOJO<sup>94</sup> (**Supplementary**  
234 **Tables 15-16; Supplementary Figures 11-12**). Genetic correlations for traits denoted with \*  
235 could not be calculated in both cohorts; \*\* denotes reverse coding. **B)** Phenomic associations  
236 (panel 1: PheWAS ( $p < 3.62E-05$ ), panel 2: LabWAS ( $p < 1.57E-04$ )) identified from PGS of coffee  
237 intake from 23andMe and UKB summary statistics. Only traits for which at least one cohort was  
238 FDR-significant are displayed (saturated bars=FDR significant; desaturated bars=FDR non-  
239 significant). neuro.=neurological; gen.=genitourinary; neopl.=neoplasms; sense=sense organs;  
240 derma.=dermatologic; imm.=immune. For full trait names and more detail, see **Supplementary**  
241 **Table 18-19**.

242

243 To further understand these discrepancies, we performed a series of genetic correlation  
244 and polygenic score analyses. First, we examined the genetic architecture of coffee intake  
245 measured in 23andMe and UKB by comparing patterns of LDSC genetic correlation ( $r_g$ ) with 317  
246 traits across 20 health, psychiatric, and anthropologic categories from publicly available GWAS  
247 summary statistics (**Figure 2A; Supplementary Table 14**). After accounting for multiple testing,  
248 75 traits were genetically correlated with coffee intake in the 23andMe cohort and 74 traits in the  
249 UKB cohort. These associations could be underpinned by other unmeasured factors, like sugar  
250 intake from coffee sweeteners or smoking and alcohol use<sup>95</sup>. However, these patterns of genetic  
251 correlations persisted after conditioning on dietary sugar intake, cigarettes smoked per day, and  
252 alcohol consumption measured by the Alcohol Use Disorder Identification Test (**AUDIT**;  
253 **Supplementary Tables 11-12; Supplementary Tables 15-16**). Strikingly, of the traits significant  
254 in at least one cohort, only 34 (29.57%) were significant in both datasets, and only 58.82% of the  
255 traits significant in both datasets shared the same direction of correlation.



256 Among the traits that were significant and consistent in direction for both cohorts, we  
257 observed positive genetic correlations between coffee intake and substance use phenotypes. For  
258 example, we identified positive genetic correlations with smoking initiation (23andMe:  $r_g=0.50$ ,  
259  $p=4.74E-47$ ; UKB:  $r_g=0.12$ ,  $p=1.89E-06$ ), drinks per week (23andMe:  $r_g=0.39$ ,  $p=3.38E-28$ ; UKB:  
260  $r_g=0.21$ ;  $p=1.39E-14$ ), and cannabis initiation (23andMe:  $r_g=0.28$ ,  $p=1.34E-08$ ; UKB:  $r_g=0.09$ ,  
261  $p=5.61E-03$ ). The strength of genetic correlations for substance use and misuse traits significant  
262 in at least one cohort was stronger in 23andMe compared to the UKB ( $0.30\pm 0.03$  vs.  $0.09\pm 0.02$ ;  
263 Welch's  $t(51.97)=5.96$ ,  $p=2.23E-07$ ). For example, associations with substance use disorder and  
264 dependence traits were mostly observed in the 23andMe cohort and were weaker or not observed  
265 in the UKB, such as for tobacco use disorder, opioid use disorder, cannabis use disorder, nicotine  
266 dependence, and alcohol dependence ( $r_g=0.24$  to  $0.44$ ,  $p=6.54E-23$  to  $2.12E-03$ ), as well as  
267 externalizing (23andMe:  $r_g=0.48$ ,  $p=7.21E-41$ ; UKB:  $r_g=0.07$ ,  $p=4.37E-03$ ), which is highly  
268 correlated with substance use and misuse<sup>96</sup>. Cluster analysis showed that genetic correlations for  
269 coffee intake in both cohorts aligned more with general substance use than misuse  
270 **(Supplementary Figure 13)**.

271 Metabolic traits were largely congruent in their positive genetic correlations with coffee  
272 intake in both cohorts. For example, BMI (23andMe:  $r_g=0.19$ ,  $p=1.61E-11$ ; UKB:  $r_g=0.25$ ,  $p=7.85E-$   
273  $26$ ) and waist-to-hip ratio (23andMe:  $r_g=0.12$ ,  $p=4.33E-04$ ; UKB:  $r_g=0.13$ ,  $p=3.96E-07$ ) were  
274 positively genetically correlated with coffee intake in both datasets. Also consistent across cohorts  
275 were the lack of significant genetic correlations with most cardiovascular and cancer traits.

276 The majority of traits were only significant in one cohort or showed discrepancies in the  
277 direction of association. For example, coffee intake measured in the 23andMe dataset was  
278 positively genetically correlated with anxiety-related traits ( $r_g=0.22$  to  $0.44$ ,  $p=1.41E-05$  to  $8.53E-$   
279  $03$ ). In contrast, all significant genetic correlations between coffee intake and anxiety-related traits  
280 in the UKB were negative ( $r_g= -0.33$  to  $-0.12$ ,  $p=5.49E-06$  to  $8.12E-03$ ), except clinically diagnosed

281 anxiety ( $r_g=0.17$ ,  $p=1.39E-05$ ). We also identified significant positive genetic correlations with  
282 cross-disorder, attention deficit hyperactivity disorder, schizophrenia, and anorexia ( $r_g=0.12$  to  
283  $0.27$ ,  $p=1.00E-07$  to  $0.01$ ) that were exclusive to the 23andMe dataset, whereas these  
284 associations were not apparent or were negatively genetically correlated in the UKB ( $r_g= -0.13$  to  
285  $0.02$ ,  $p=1.01E-04$  to  $0.55$ ). Significant positive correlations with cognitive variables, such as  
286 executive function and intelligence, were found in the UKB ( $r_g= 0.13$  to  $0.23$ ,  $p=4.55E-08$  to  $8.04E-$   
287  $23$ ), though these were negatively genetically correlated in 23andMe ( $r_g= -0.17$  to  $-0.10$ ,  $p=7.83E-$   
288  $08$  to  $2.06E-03$ ). Certain correlations with physical health traits also differed between cohorts.  
289 While correlations with most gastrointestinal traits in the 23andMe cohort were positive, such as  
290 a positive genetic correlation with gastric ulcers ( $r_g=0.41$ ,  $p=3.58E-03$ ), the corresponding genetic  
291 correlations observed in the UKB were either non-significant or negative ( $r_g= -0.22$  to  $0.12$ ,  
292  $p=1.34E-06$  to  $0.88$ ). Positive genetic correlations with chronic pain as well as back, hip, and knee  
293 pain were observed in the 23andMe dataset ( $r_g=0.12$  -  $0.26$ ,  $p=9.02E-08$  -  $3.58E-03$ ), yet only  
294 negative genetic correlations with pain traits were reported in the UKB ( $r_g=-0.22$  to  $-0.12$ ,  $p=6.23E-$   
295  $04$  -  $2.54E-06$ ). Across all health and psychiatric traits that were significant within each cohort, all  
296 traits showed a positive genetic correlation with coffee intake in 23andMe participants. Only  
297 41.3% of correlations were positive in the UKB.

298 We observed similar discrepancies when we extended our results to a health-care system  
299 population (**Figure 2B**). We conducted PheWAS and LabWAS by testing the association between  
300 polygenic scores (**PGS**) for coffee intake derived from 23andMe or the UKB with 1,655 medical  
301 traits and biomarkers. We identified 31 PheWAS and LabWAS traits that met the 5% FDR  
302 significance threshold using the 23andMe PGS, and 24 using the UKB PGS (**Supplementary**  
303 **Tables 17 and 18**). Only two endocrine traits (i.e., obesity and morbid obesity) and two biomarkers  
304 related to red blood cells were consistent in significance and direction of association. Otherwise,  
305 all significant associations were observed when testing PGS generated from one cohort but not

306 the other. For instance, when coffee intake PGS were derived from 23andMe, among the top  
307 positive PheWAS and LabWAS associations were substance use disorders and respiratory  
308 conditions (e.g., chronic airway obstruction, emphysema, and respiratory failure) and absolute  
309 monocyte count. Among the top negative associations derived from 23andMe PGS were those  
310 with sense organs, neoplasms, certain respiratory conditions (i.e., allergic rhinitis, acute and  
311 chronic tonsillitis, chronic tonsillitis and adenoiditis), and urea nitrogen serum/plasma. When  
312 coffee intake PGS were derived from UKB, among the top positive PheWAS and LabWAS  
313 associations were endocrine and musculoskeletal disorders, as well as the two metabolic  
314 biomarkers, glycated hemoglobin A1c and glucose. The only significant negative PheWAS and  
315 LabWAS associations from UKB-derived PGS were with anxiety disorders, and biomarkers  
316 related to blood (mean corpuscular hemoglobin concentration) and metabolic (cholesterol and  
317 triglycerides in serum or blood) traits.

## 318 **Discussion**

319 In this study, we contributed to the existing GWAS literature of coffee intake by analyzing  
320 a US population of 130,153 participants. We uncovered seven loci associated with coffee intake,  
321 most of which were in genes implicated in metabolic processes. Coffee related variants were  
322 significantly enriched in the central nervous system. Despite prior evidence that coffee intake  
323 confers health benefits, we found genetic correlations mostly with adverse outcomes in both  
324 cohorts, particularly substance use disorders and obesity-related traits, in both cohorts.  
325 Relationships with other medical, anthropologic, and psychiatric traits were inconsistent in the US  
326 and UK cohorts, suggesting that differences between populations may affect coffee intake GWAS  
327 results and its genetic relationships with other traits.

328 Our GWAS replicated prior associations with genes and variants implicated in coffee and  
329 caffeine intake as well as other metabolic and xenobiotic processes<sup>28</sup>, including rs2472297 near  
330 *CYP1A1/CYP1A2*<sup>18,24,26,33,46</sup> and rs4410790 near *AHR*<sup>18,23,24,26,27,46,97</sup>, even though our study

331 sample was smaller compared to other GWAS ( $N=125,776-373,522^{20,24,26}$ ). Gene-based analyses  
332 uncovered 165 candidate genes, including four genes that overlapped across all four analyses:  
333 *MPI*, *SCAMP2*, *SCAMP5*, and *FAM219B*, all of which have been implicated in a prior coffee  
334 GWAS<sup>18</sup>. These overlapping genes have other associations with substance use and medical  
335 biomarkers including blood pressure, hypertension, and LDL cholesterol<sup>91,98-104</sup>. We identified  
336 gene enrichment in brain tissues across the frontal cortex, putamen, and hippocampus, consistent  
337 with prior GWAS showing enrichment for SNPs associated with coffee and caffeine in the central  
338 nervous system<sup>18,20,26</sup>. This is supported by brain imaging studies across cortical and subcortical  
339 areas showing morphological<sup>105-108</sup> and functional<sup>109,110</sup> differences between those who habitually  
340 drink coffee compared to those who do not.

341 One of the most striking observations of this study is the breadth and magnitude of positive  
342 associations between coffee intake with substance use. It is widely believed that use of one  
343 substance heightens risk for use of other substances and that there are common genetic risk  
344 factors for any substance use<sup>111,112</sup>; coffee, which is not generally considered a drug of misuse,  
345 does not appear to be exempt from this. We identified positive genetic correlations between coffee  
346 intake and other substances (i.e., tobacco, alcohol, cannabis and opioid use), as well as relevant  
347 personality traits like externalizing behavior. The genetics of coffee intake aligned with substance  
348 consumption phenotypes, corroborating prior GWAS and twin studies<sup>113-115</sup> (but see<sup>23</sup>), but not  
349 with substance misuse. This is perhaps unsurprising because the phenotype probed by the  
350 23andMe and UKB cohorts focuses on quantity rather than clinically-defined dependence. We  
351 and others previously demonstrated that the genetic architectures of other substance intake  
352 versus problematic use are unique<sup>43,111,116-119</sup>, and this is likely also true for coffee.

353 We found consistent positive genetic correlations with BMI and obesity in both 23andMe  
354 and the UKB. This is in contrast to meta-analyses of randomized control trials and epidemiological  
355 studies that found unclear effects by any coffee or decaffeinated coffee intake on waist  
356 circumference and BMI-defined obesity, and a modest inverse relationship between coffee intake

357 and BMI<sup>120,121</sup>. Results for these studies are highly heterogeneous, likely due to interindividual  
358 variability in the inclusion of sugary coffee additives, cultivation, roasting, and brewing conditions  
359 affecting its chemical makeup<sup>9,122</sup>, and other habits surrounding coffee intake (e.g., concurrent  
360 food intake or appetite suppression by nicotine if smoking concurrently<sup>123</sup>). This contentious  
361 relationship may also be explained by the amount of coffee intake, as greater coffee intake seems  
362 to attenuate the genetic associations with BMI and obesity<sup>49</sup>, possibly due to the appetite  
363 suppressant effects of caffeine<sup>124</sup>. Alongside accounting for other dietary intake, detailed  
364 accounting of coffee preparation, and consumptive habits formed with coffee intake, future  
365 subgroup analyses may help explain discrepant associations between the genetics and  
366 prevalence of coffee intake with BMI-related traits.

367 We did not recapitulate the beneficial phenotypic relationships between coffee intake and  
368 a variety of health outcomes that are generally reported by health association studies<sup>6-8,10,125-137</sup>,  
369 perhaps because our study focused on the genetic relationship between coffee intake and other  
370 medical outcomes, or because our study focused on coffee intake and not caffeine intake. At the  
371 genetic level, we find no evidence of a common genetic background that could explain the  
372 beneficial effects of coffee on 29 cancers, Alzheimer's disease/dementia/cognitive impairments,  
373 Parkinson's disease, diabetes, cirrhosis, most cardiovascular conditions, or gout. In fact, some of  
374 these associations (e.g., cardiovascular traits and type II diabetes) were positive in the 23andMe  
375 cohort but showed no significant associations in the UKB cohort. Similarly, phenome-wide  
376 analysis did not support prior cancerous, metabolic, cardiovascular, or neurological health  
377 advantages of coffee intake<sup>6-8,10,126-136,138</sup>. Although this may seem discrepant to phenotypic  
378 associations that generally report health benefits of coffee intake, recent meta-analysis of over  
379 100 phenotypic studies on coffee intake health outcomes suggest high levels of heterogeneity  
380 across cohorts<sup>6,7</sup>, especially across geographically separated populations<sup>6</sup>.

381 We found many opposing relationships with the genetics of coffee intake between  
382 23andMe and UKB. For example, genetic correlations with pain, psychiatric illnesses, and

383 gastrointestinal traits were positively genetically correlated with coffee intake in 23andMe, but  
384 these associations were negative in the UKB. Inversely, the UKB analysis revealed that coffee  
385 intake was positively genetically correlated with cognitive traits, such as executive function and  
386 intelligence, corroborating prior evidence<sup>139-142</sup>, yet genetic correlations with these two traits were  
387 negative in 23andMe. Multiple PheWAS associations were also discordant. When PGS were  
388 derived from 23andMe, we observed heightened odds between genetic liability for coffee intake  
389 and respiratory illnesses, ischemic heart disease, infection, and alcohol-related disorders. Higher  
390 odds for musculoskeletal and sleep conditions were mostly associated with coffee PGS generated  
391 from the UKB. Only 11 out of the 42 phenotypes associated with coffee intake PGS showed  
392 negative associations, and none of these purported health “benefits” were consistently observed  
393 in both cohorts. Whereas the coffee intake PGS from 23andMe was associated with lower odds  
394 for ear conditions, skin neoplasms, allergic rhinitis, and tonsillitis, the PGS of coffee intake from  
395 the UKB was associated with a lower risk of anxiety disorders. Also of note is that the number of  
396 positive genetic correlations and PGS associations between coffee intake and these other traits  
397 was greater when analyzed using data from the 23andMe cohort versus from the UKB, and the  
398 strength of these associations was usually stronger. Partially consistent with this, one meta-  
399 analysis of mortality found an inverse relationship between coffee intake and all-cause mortality  
400 in European but not US studies<sup>143</sup>.

401 Our study shows that cultural, cohort, or geographic influences could affect the inferred  
402 genetic architecture of coffee intake and its associations with other health and lifestyle outcomes.  
403 Geographic regions may have an observable influence on GWAS results<sup>144</sup>. We observed no  
404 significant differences in subtle geographic differences on coffee intake correlations using location  
405 data available in the UKB (**Supplementary Figure 14**), suggesting cultural differences may  
406 contribute more to the cohort variations we report here. There is considerable variation in how or  
407 with whom one may consume coffee that could be subject to cultural influence. Caffeinated  
408 beverage sales, for instance, suggest that coffee and carbonated caffeinated beverages are more

409 preferred in the US than the UK<sup>2</sup>, whereas tea is the preferred source of caffeine in the UK and  
410 may modify coffee intake<sup>2</sup> (**Supplementary Figure 15**). Higher levels of coffee intake or caffeine  
411 from high caloric beverages in the US cohort may partially explain the higher number and  
412 magnitude of negative health associations observed in the 23andMe analysis. Even across coffee  
413 beverage subtypes, the concentration of caffeine, other coffee chemical constituents, and  
414 manufacturing byproducts (e.g., plastics and metals from packaging) varies and thus may be  
415 important parameters in health associations<sup>122,145,146</sup>. A recent investigation revealed the volume  
416 of ground or instant coffee is important to the potential health effects of its intake<sup>147</sup>; instant coffee  
417 (~60 mg of caffeine per cup) is more commonplace in the UK whereas fresh brewed coffee (~85  
418 mg of caffeine per cup<sup>20</sup>) is preferred in the US<sup>2</sup>. Cultural differences in coffee intake could help  
419 explain the divergent patterns of health and lifestyle associations between UK and US  
420 participants, though the relative contributions of culture, geography, and their interactions to these  
421 differences will need further exploration.

422         There are multiple caveats to consider when interpreting our findings. Firstly, our study  
423 does not address causality between coffee intake and other health and lifestyle traits. Mendelian  
424 randomization (**MR**) studies have attempted to address the exposure-outcome relationships  
425 between two traits by using genetic instruments (i.e., SNPs identified by GWAS) as proxies for  
426 exposure and associating them with an outcome of interest. For example, MR using genetic  
427 markers associated with coffee intake suggest that coffee consumption has no causal effect on  
428 obesity and endocrine disorders, despite observational studies suggesting protective effects of  
429 coffee<sup>148</sup>. Similarly, MR studies of coffee and other substance use (e.g., tobacco, alcohol,  
430 cannabis) are also contentious<sup>149,150</sup>, with evidence that inconsistencies may be driven by gene-  
431 cohort confounds such as those we found in this study<sup>151</sup>. Secondly, the phenotype examined by  
432 23andMe was exclusively caffeinated coffee intake, with one cup defined as 5 ounces, whereas  
433 the UKB also included decaffeinated coffee and did not explicitly define the volume of one cup.  
434 The caffeine content within coffee was also not directly measured. However, secondary analysis

435 using summary statistics of estimated caffeine intake from any coffee subtype in the UKB<sup>20</sup> yielded  
436 remarkably similar patterns of genetic correlations as those derived from our GWAS of cups of  
437 coffee consumed (**Supplementary Figure 16, Supplemental Table 14**). This analysis  
438 presumably mitigated the relative contribution of decaffeinated coffee (3mg of caffeine per cup  
439 versus 60 to 85mg per cup of caffeinated coffee<sup>20</sup>) to the revealed genetic associations, so we do  
440 not believe the cohort discrepancies are driven by the inclusion of decaffeinated coffee drinkers  
441 in the UKB. Another consideration is the possible health effects of non-caffeine coffee  
442 components, which are comparatively under-investigated<sup>9</sup>, such as other coffee bean  
443 phytochemical and drink additives. Furthermore, while it is unlikely that the discrepancies in  
444 genetic associations are driven by age, which is similar between cohorts (approximately 53 years  
445 old in 23andMe versus 57<sup>20</sup> years old in UKB), these cohorts skew older than the population  
446 average. They are also of above average socioeconomic status<sup>152</sup> and are of European descent,  
447 limiting generalizability of our findings to a larger population. Some studies also show sex-  
448 dependent differences in coffee and caffeine metabolism and health associations with  
449 intake<sup>138,153,154</sup>, which was not examined in our study.

450 Overall, we present striking differences in genetic associations of coffee intake across two  
451 large cohorts of European ancestry. While some genetic signals replicate across diverse cohorts,  
452 such as our GWAS findings and the associations between coffee intake with substance use and  
453 obesity traits, other associations may be obscured by cohort or cultural differences related to the  
454 phenotype in question. Our study provides a cautionary perspective on combining large cohort  
455 datasets gathered from unique geo-cultural populations.

456



## 457 **Acknowledgements**

458 We would like to thank the research participants and employees of 23andMe for making  
459 this work possible. The following members of the 23andMe Research Team contributed to this  
460 study: Stella Aslibekyan, Adam Auton, Elizabeth Babalola, Robert K. Bell, Jessica Bielenberg,  
461 Katarzyna Bryc, Emily Bullis, Daniella Coker, Gabriel Cuellar Partida, Devika Dhamija, Sayantan  
462 Das, Teresa Filshtein, Kipper Fletez-Brant, Will Freyman, Karl Heilbron, Pooja M. Gandhi, Karl  
463 Heilbron, Barry Hicks, David A. Hinds, Ethan M. Jewett, Yunxuan Jiang, Katelyn Kukar, Keng-  
464 Han Lin, Maya Lowe, Jey C. McCreight, Matthew H. McIntyre, Steven J. Micheletti, Meghan E.  
465 Moreno, Joanna L. Mountain, Priyanka Nandakumar, Elizabeth S. Noblin, Jared O'Connell, Aaron  
466 A. Petrakovitz, G. David Poznik, Morgan Schumacher, Anjali J. Shastri, Janie F. Shelton,  
467 Jingchunzi Shi, Suyash Shringarpure, Vinh Tran, Joyce Y. Tung, Xin Wang, Wei Wang, Catherine  
468 H. Weldon, Peter Wilton, Alejandro Hernandez, Corinna Wong, Christophe Toukam Tchakouté.

469 We would also like to thank The Externalizing Consortium for sharing the GWAS summary  
470 statistics of externalizing. The Externalizing Consortium: Principal Investigators: Danielle M. Dick,  
471 Philipp Koellinger, K. Paige Harden, Abraham A. Palmer. Lead Analysts: Richard Karlsson Linnér,  
472 Travis T. Mallard, Peter B. Barr, Sandra Sanchez-Roige. Significant Contributors: Irwin D.  
473 Waldman. The Externalizing Consortium has been supported by the National Institute on Alcohol  
474 Abuse and Alcoholism (R01AA015416 -administrative supplement), and the National Institute on  
475 Drug Abuse (R01DA050721). Additional funding for investigator effort has been provided by  
476 K02AA018755, U10AA008401, P50AA022537, as well as a European Research Council  
477 Consolidator Grant (647648 EdGe to Koellinger). The content is solely the responsibility of the  
478 authors and does not necessarily represent the official views of the above funding bodies. The  
479 Externalizing Consortium would like to thank the following groups for making the research  
480 possible: 23andMe, Add Health, Vanderbilt University Medical Center's BioVU, Collaborative  
481 Study on the Genetics of Alcoholism (COGA), the Psychiatric Genomics Consortium's Substance

482 Use Disorders working group, UK10K Consortium, UK Biobank, and Philadelphia  
483 Neurodevelopmental Cohort.

484 MVJ, SBB, and SSR are supported by funds from the California Tobacco-Related Disease  
485 Research Program (TRDRP; Grant Number T29KT0526 and T32IR5226). SBB and AAP were  
486 also supported by P50DA037844. BP, JJM, and SSR are supported by NIH/NIDA DP1DA054394.  
487 HHAT is funded through a Natural Science and Engineering Research Council PGS-D  
488 scholarship and Canadian Institutes of Health Research (CIHR) Fellowship. JYK is supported by  
489 a CIHR Canada Research Chair in Translational Neuropsychopharmacology. LKD is supported  
490 by R01 MH113362. NSC is funded through an Interdisciplinary Research Fellowship in  
491 NeuroAIDs (Grant Number R25MH081482). JM is funded by the National Institute for Health and  
492 Care Research (NIHR) Maudsley Biomedical Research Centre at South London and Maudsley  
493 NHS Foundation Trust and King's College London. The content is solely the responsibility of the  
494 authors and does not necessarily represent the official views of the National Institutes of Health.

495 The datasets used for the PheWAS and LabWAS analyses described were obtained from  
496 Vanderbilt University Medical Center's BioVU which is supported by numerous sources:  
497 institutional funding, private agencies, and federal grants. These include the NIH funded Shared  
498 Instrumentation Grant S10RR025141; and CTSA grants UL1TR002243, UL1TR000445, and  
499 UL1RR024975. Genomic data are also supported by investigator-led projects that include  
500 U01HG004798, R01NS032830, RC2GM092618, P50GM115305, U01HG006378,  
501 U19HL065962, R01HD074711; and additional funding sources listed  
502 at <https://victr.vumc.org/biovu-funding/>. PheWAS and LabWAS analyses used CTSA (SD,  
503 Vanderbilt Resources). This project was supported by the National Center for Research  
504 Resources, Grant UL1 RR024975-01, and is now at the National Center for Advancing  
505 Translational Sciences, Grant 2 UL1 TR000445-06.

506 **Author Contributions**

507 SSR and AAP conceived the idea. PF and SLE contributed formal analyses and curation  
508 of 23andMe data. HHAT contributed to formal analyses, investigation, and data visualization. BP,  
509 AA, and NCK contributed to formal data analysis and data visualization. JJM and LVR contributed  
510 to formal analyses. JM contributed to data visualization. HHAT and SSR wrote the manuscript.  
511 All authors reviewed and edited the manuscript.

### 512 **Competing interests**

513 PF and SLE are employees of 23andMe, Inc., and hold stock or stock options in 23andMe.  
514 AAP is on the scientific advisory board of Vivid Genomics for which he receives stock options.

### 515 **Materials and Correspondence**

516 Correspondence and material requests should be directed to Sandra Sanchez-Roige,  
517 [sanchezroige@ucsd.edu](mailto:sanchezroige@ucsd.edu).

### 518 **Data availability**

519 We will provide 23andMe summary statistics for the top 10,000 SNPs upon publication.  
520 Full GWAS summary statistics will be made available through 23andMe to qualified researchers  
521 under an agreement with 23andMe that protects the privacy of the 23andMe participants.  
522 Please visit (<https://research.23andme.com/collaborate/#dataset-access/>) for more information  
523 and to apply to access the data.

## 524 **Methods**

### 525 **Study cohorts, coffee intake and univariate GWAS**

526 23andMe. Univariate GWAS was conducted in a sample of 130,153 male and female  
527 research participants of the genetics testing company 23andMe, Inc, as previously described<sup>155</sup>.  
528 Participants provided informed consent and volunteered to participate in the research online,  
529 under a protocol approved by the external AAHRPP-accredited IRB, Ethical & Independent (E&I)  
530 Review Services. As of 2022, E&I Review Services is part of Salus IRB  
531 (<https://www.versiticlinicaltrials.org/salusirb>). During 4 months in 2015 and 14 months between  
532 2018-2020, participant responses to the question “How many 5-ounce (cup-sized) servings of  
533 caffeinated coffee do you consume each day?” were collected as part of a larger survey.  
534 Participants categorized as of European descent by genotype data were included in the univariate  
535 GWAS (see **Supplementary Material**)<sup>156</sup>. Participant demographics are presented in  
536 **Supplementary Table 2**.

537 DNA extraction and genotyping were performed from saliva samples by clinical laboratories  
538 CLIA-certified and CAP-accredited by the Laboratory Corporation of America. 23andMe, Inc.  
539 conducted all quality control, imputation, and univariate genome-wide analyses as previously  
540 described (see **Supplementary Table 4** for SNPs analyzed following quality control and  
541 imputation)<sup>157,158</sup>. Variants were imputed based on an imputation panel combining 1000 Genomes  
542 Phase 3, UK10K and the Human Reference Consortium. The 23andMe pipeline removes variants  
543 of low genotyping quality (failed a Mendelian transmission test in trios ( $p < 1.00E-20$ ), failed Hardy-  
544 Weinberg test ( $p < 1.02E-20$ ), failed batch effects test (ANOVA  $p < 1.00E-20$ ), or had a call rate  
545  $< 90\%$ ) or imputation quality ( $r^2 < 0.50$  averages across genotyping arrays or a minimum  $r^2 < 0.3$  or  
546 variants with apparent batch effects ( $p < 1.00E-50$ ))<sup>157,159</sup>. The 23andMe GWAS pipeline performs  
547 linear regression and assumes an additive model for allelic effects<sup>43,155,160,161</sup>. Only unrelated  
548 participants were included in the GWAS, which was determined using a segmental identity-by-

549 descent (**IBD**) estimation algorithm. Two individuals that shared more than 700 cM IBD at one or  
550 both genomic segments (~20% of the genome) were classified as related. This is the minimum  
551 threshold expected to identify first cousins in an outbred population. Age (inverse-normal  
552 transformed), sex, the top five principal genotype components, and indicator variables for  
553 genotype platforms were applied as covariates and  $p$ -values were corrected for genomic control.

554 We conducted replication in three multi-ancestral cohorts (European ancestry  $N=689,661$ ;  
555 African American ancestry  $N=32,312$ ; Latin American ancestry  $N=124,155$ ; daily mg of caffeine  
556 from coffee, transformed by  $\log_{10}(x+75)$ ). Demographic information on these cohorts is shown in  
557 **Supplementary Table 3**. Ancestry was determined by analyzing local ancestry (see  
558 **Supplementary Material**)<sup>156</sup>.

559 UK Biobank. Summary statistics of coffee intake ( $N=334,659$ ) were generated from UK  
560 Biobank (**UKB**) participants. Participants provided informed consent, were of White British  
561 descent, and answered the question “How many cups of coffee do you drink each day? (Include  
562 decaffeinated coffee)”. Other previously published GWAS of coffee intake with publicly available  
563 summary statistics were not included in our meta-analysis due to differences in the way that coffee  
564 intake was measured (e.g., “How often do you drink coffee?”, “How much coffee do you consume  
565 per year?”<sup>30</sup>), or differences in ascertainment (e.g., Parkinson’s disease only<sup>31</sup>). Secondary  
566 analysis was also conducted with GWAS summary statistics of caffeine intake from coffee  
567 ( $N=373,522$ ) in the UKB that was calculated based on the number of cups of caffeinated and  
568 decaffeinated coffee consumed<sup>20</sup>. For further information about the UKB data collection and  
569 GWAS summary statistics for coffee intake and caffeine consumed from coffee, see  
570 <http://www.nealelab.is/uk-biobank/> (field 1498, both sexes) and Said et al. 2020<sup>20</sup>, respectively.

571 GWAS meta-analysis. We performed sample size weighted meta-analysis of the 23andMe  
572 and UKB cohorts using METAL (version 2020-05-05)<sup>93</sup> as previously described<sup>43</sup>. A total of

573 491,347 participants of European ancestry and 9,551,852 SNPs passing quality control were  
574 included in this meta-analysis.

575

#### 576 **Gene-based analyses (MAGMA, H-MAGMA, SPrediXcan/S-MultiXcan)**

577 The web-based platform Functional Mapping and Annotation of Genome-Wide  
578 Association Studies (**FUMA** v1.3.8) was used to further explore the functional consequences of  
579 lead SNPs and identify prior associations in the literature. GWA significant lead SNPs of coffee  
580 cups per day consumed from the UKB were identified using FUMA. SNPs were annotated based  
581 on ANNOVAR categories, Combined Annotation Dependent Depletion scores, RegulomeDB  
582 scores, expression quantitative trait loci (**eQTLs**), and chromatin state predicted by ChromHMM.  
583 Novel coffee intake candidate genes were identified as genes not in linkage disequilibrium or  
584 within 1Mb of GWAS-significant SNPs uncovered by other GWAS of coffee and caffeine traits  
585 (e.g., coffee/caffeine intake or caffeine metabolism). These SNPs were identified using the EBI  
586 GWAS Catalog (<https://www.ebi.ac.uk/gwas/>).

587 *MAGMA gene-based and pathway analyses.* We used “Multi-marker Analysis of GenoMic  
588 Annotation” (MAGMA, v1.08) to conduct gene-based associations on the 23andMe GWAS  
589 summary statistics of coffee intake. SNPs were annotated to protein-coding genes using FUMA  
590 and Ensembl build v92, which accounts for SNP LD using multiple regression methods. The  
591 default settings were used, and LD was estimated using the 1000 Genomes European reference  
592 sample. The significance of associations across 19,773 genes were adjusted using Bonferroni  
593 correction for multiple testing (one-sided  $p < 2.53E-06$ ; **Supplementary Table 7**). Gene-set  
594 analysis was subsequently conducted on 10,678 gene-sets and Gene Ontology terms curated  
595 from the Molecular Signatures Database (MsigDB v7.0). Tissue-specific gene expression profiles  
596 were also assessed in 54 tissue types and 30 general tissue types across the body with average  
597 gene expression in each tissue type used as a covariate in the analysis (**Supplementary Table**

598 **13).** Using Genome-Tissue Expression (**GTEx**, v8) RNA-seq data, gene expression values were  
599  $\log_2$  transformed values of the average Reads Per Kilobase Million (RPKM) for each tissue type  
600 (RPKM>50 were listed as 50). Significance was determined following Bonferroni correction (one-  
601 sided  $p < 9.26E-04$  for 54 tissue types; one-sided  $p < 1.67E-03$  for 30 general tissue types).

602 *H-MAGMA*. To identify neurobiologically relevant target genes, we incorporated coffee  
603 intake GWAS data with chromatin interaction profiles from human brain tissue using Hi-C coupled  
604 MAGMA (**H-MAGMA**)<sup>162</sup>.

605 *S-PrediXcan and S-MultiXcan*. We performed a transcriptome-wide association study  
606 (**TWAS**) using the MetaXcan package (ver0.7.5)<sup>163,164</sup> consisting of S-PrediXcan and S-MultiXcan  
607 to identify specific eQTL-linked genes associated with coffee intake. eQTLs are genomic loci that  
608 contribute to heritable variation in mRNA levels that might influence the expression of a particular  
609 gene or its neighbors. This approach uses genetic information to predict gene expression levels  
610 in various brain tissues and tests whether the predicted gene expression correlates with coffee  
611 intake. S-PrediXcan uses precomputed tissue weights from the GTEx project database  
612 (<https://www.gtexportal.org/>) as the reference transcriptome dataset via Elastic net models. As  
613 input data, we included our GWAS summary statistics, transcriptome tissue data, and covariance  
614 matrices of the SNPs within each gene model (based on HapMap SNP set; available to download  
615 at the PredictDB Data Repository) from all available tissues ( $N=49$ ). We applied a Bonferroni  
616 correction for multiple testing across all tissues ( $N=21,565$ ; **Supplementary Table 10**).

### 617 **LDSC heritability and genetic correlations**

618 Linkage Disequilibrium Score regression (**LDSC**; <https://github.com/bulik/ldsc>) was used  
619 to calculate heritability ( **$SNP-h_2$** ) and genetic correlations between habitual coffee intake and other  
620 phenotypes<sup>165</sup>.  $SNP-h_2$  was calculated from publicly available, pre-computed LD scores  
621 (“eur\_w\_ld\_chr”). LDSC was also used to calculate genetic correlations ( $r_g$ ) between habitual

622 coffee intake and 317 selected traits informed by prior literature across the following categories:  
623 substance use and misuse, anxiety, bipolar disorder & depression, cancer, cardiovascular, diet,  
624 gastrointestinal, lifestyle, metabolic, neurological, pain, personality, other anthropologic, other  
625 health, and other psychiatric traits.

## 626 **mtCOJO**

627 We conditioned summary statistics on traits that are correlated with coffee intake using  
628 mtCOJO<sup>94</sup> to determine if genetic associations are retained after controlling for their effects.  
629 Conditioning on GWAS summary statistics for dietary sugar intake<sup>166</sup>, Alcohol Use Disorder  
630 Identification Test (**AUDIT**) consumption<sup>43</sup>, and cigarettes smoked per day<sup>73</sup> were examined at a  
631  $p < 1.0E-5$  and clump- $r^2$  threshold of 0.10.

## 632 **Phenome and laboratory-wide association studies**

633 We conducted phenome-wide association analyses (**PheWAS**) and Laboratory-wide  
634 association analyses (**LabWAS**) to test the association between polygenic scores (**PGS**) for  
635 coffee intake and liability across thousands of medical conditions from hospital-based cohorts.  
636 These analyses were conducted using data from the Vanderbilt University Medical Center  
637 (**VUMC**). The project was approved by the VUMC Institutional Review Board (IRB #160302,  
638 #172020, #190418). VUMC is an integrated health system with individual-level health data from  
639 electronic health record (**EHR**) data for about 3.2 million patients. The VUMC biobank contains  
640 clinical data from EHR as well as biomarkers obtained from laboratory assessments. A portion of  
641 the individuals from VUMC also have accompanying array genotyping data. This cohort, with over  
642 72,821 patients, is called BioVU<sup>167,168</sup>.

643 For each of the unrelated genotyped individuals of European ancestry from BioVU, we  
644 computed polygenic scores for coffee intake using the PRS-CS “auto” version<sup>167</sup>. Genotyping and  
645 quality control for this cohort have been extensively described<sup>168,169</sup>.



646 Phenome-wide association analyses (PheWAS). To identify associations between the  
647 PGS for coffee and clinical phenotypes, we performed a PheWAS. We fitted a logistic regression  
648 model to each of 1,338 case/control disease phenotypes (“phecodes”) to estimate the odds of  
649 each diagnosis given the coffee PGS, while adjusting for sex, median age of the longitudinal EHR,  
650 and the first 10 PCs. Analyses were conducted using the PheWAS v0.12 R package<sup>170</sup>. We  
651 required the presence of at least two International Disease Classification codes mapped to a  
652 PheWAS disease category (Phecode Map 1.2; <https://phewascatalog.org/phecodes>) and a  
653 minimum of 100 cases for inclusion of a phecode. The disease phenotypes included 145  
654 circulatory system, 120 genitourinary, 119 endocrine/metabolic, 125 digestive, 117 neoplasms,  
655 91 musculoskeletal, 85 sense organs, 76 injuries & poisonings, 65 dermatological, 76 respiratory,  
656 69 neurological, 64 mental disorders, 42 infectious diseases, 42 hematopoietic, 34 congenital  
657 anomalies, 37 symptoms, and 31 pregnancy complications.

658 Laboratory-wide association analyses (LabWAS). We also examined laboratory results in  
659 BioVU, which we refer to as LabWAS. We implemented the pipeline already established by  
660 Dennis, et al.<sup>169</sup>. Broadly, LabWAS uses the median, inverse normal quantile transformed age-  
661 adjusted values from the QualityLab pipeline in a linear regression to determine the association  
662 with the input coffee intake PGS variable. We controlled for the same covariates as for the  
663 PheWAS analyses, excluding median age because the pipeline corrects for age using cubic  
664 splines with 4 knots.

## 665 **Cluster analysis**

666 Previous studies have shown that consumption and misuse/dependence phenotypes  
667 have a distinct genetic architecture<sup>43,111,116-119</sup>. To explore whether the coffee intake analysis  
668 clustered closer to substance intake or misuse/dependence phenotypes, we used an  
669 unsupervised machine learning hierarchical clustering algorithm known as agglomerative nesting  
670 (**AGNES**)<sup>167</sup> on a genetic correlation matrix of all traits. AGNES initially forms single-item clusters

671 that are fused together into intermediate groups until all traits are included in a single cluster<sup>171</sup>.  
672 Clusters are formed with Ward's method such that the total within cluster variance is minimized  
673 while maintaining the fewest number of clusters based on cluster dissimilarity. Dissimilarity is  
674 assessed through Euclidean Distance of each pairwise genetic correlation with another trait. The  
675 product of AGNES is a dendrogram, formed with multiple brackets called "branches". AGNES  
676 was implemented in R using the *cluster* package (ver2.1.4)<sup>167</sup>.

677 Clustering was conducted with summary statistics of cigarettes per day<sup>73</sup>, former  
678 smoker<sup>73</sup>, smoking initiation<sup>73</sup>, problematic opioid use<sup>161</sup>, ICD10 F17 nicotine dependence<sup>172</sup>,  
679 alcohol dependence<sup>173</sup>, AUDIT consumption<sup>116</sup>, AUDIT problems<sup>116</sup>, cannabis initiation<sup>79</sup>,  
680 cannabis use disorder<sup>118</sup>, drinks per week<sup>73</sup>, externalizing psychopathology<sup>96</sup>, Fagerström Test  
681 for Nicotine Dependence (FTND)<sup>174</sup>, general risk tolerance<sup>175</sup>, age of smoking initiation<sup>73</sup>, and  
682 opioid use disorder<sup>161</sup>. The genetic correlations of cigarettes per day, former smoker, and smoking  
683 initiation were reverse coded to show the intuitive effects against the other traits in the  
684 dendrogram.

685

686

## References

- 687 1 International Coffee Organization. Annual Review Coffee Year 2019/2020. (International  
688 Coffee Organization, London, 2021).
- 689 2 Reyes, C. M. & Cornelis, M. C. Caffeine in the Diet: Country-Level Consumption and  
690 Guidelines. *Nutrients* **10**, doi:10.3390/nu10111772 (2018).
- 691 3 Landais, E. *et al.* Coffee and Tea Consumption and the Contribution of Their Added  
692 Ingredients to Total Energy and Nutrient Intakes in 10 European Countries: Benchmark  
693 Data from the Late 1990s. *Nutrients* **10**, doi:10.3390/nu10060725 (2018).
- 694 4 Rehm, C. D., Ratliff, J. C., Riedt, C. S. & Drewnowski, A. Coffee Consumption among  
695 Adults in the United States by Demographic Variables and Purchase Location: Analyses  
696 of NHANES 2011-2016 Data. *Nutrients* **12**, doi:10.3390/nu12082463 (2020).
- 697 5 Camandola, S., Plick, N. & Mattson, M. P. Impact of Coffee and Cacao Purine  
698 Metabolites on Neuroplasticity and Neurodegenerative Disease. *Neurochem Res* **44**,  
699 214-227, doi:10.1007/s11064-018-2492-0 (2019).
- 700 6 Grosso, G., Godos, J., Galvano, F. & Giovannucci, E. L. Coffee, Caffeine, and Health  
701 Outcomes: An Umbrella Review. *Annu Rev Nutr* **37**, 131-156, doi:10.1146/annurev-nutr-  
702 071816-064941 (2017).
- 703 7 Poole, R. *et al.* Coffee consumption and health: umbrella review of meta-analyses of  
704 multiple health outcomes. *BMJ* **359**, j5024, doi:10.1136/bmj.j5024 (2017).
- 705 8 Kositamongkol, C. *et al.* Coffee Consumption and Non-alcoholic Fatty Liver Disease: An  
706 Umbrella Review and a Systematic Review and Meta-analysis. *Front Pharmacol* **12**,  
707 786596, doi:10.3389/fphar.2021.786596 (2021).
- 708 9 Socala, K., Szopa, A., Serefko, A., Poleszak, E. & Wlaz, P. Neuroprotective Effects of  
709 Coffee Bioactive Compounds: A Review. *Int J Mol Sci* **22**, doi:10.3390/ijms22010107  
710 (2020).

- 711 10 Zhao, L. G. *et al.* Coffee drinking and cancer risk: an umbrella review of meta-analyses  
712 of observational studies. *BMC Cancer* **20**, 101, doi:10.1186/s12885-020-6561-9 (2020).
- 713 11 Freedman, N. D., Park, Y., Abnet, C. C., Hollenbeck, A. R. & Sinha, R. Association of  
714 coffee drinking with total and cause-specific mortality. *N Engl J Med* **366**, 1891-1904,  
715 doi:10.1056/NEJMoa1112010 (2012).
- 716 12 Svikis, D. S. *et al.* Coffee and energy drink use patterns in college freshmen:  
717 associations with adverse health behaviors and risk factors. *BMC Public Health* **22**, 594,  
718 doi:10.1186/s12889-022-13012-3 (2022).
- 719 13 Swan, G. E., Carmelli, D. & Cardon, L. R. Heavy consumption of cigarettes, alcohol and  
720 coffee in male twins. *J Stud Alcohol* **58**, 182-190, doi:10.15288/jsa.1997.58.182 (1997).
- 721 14 Treur, J. L. *et al.* Associations between smoking and caffeine consumption in two  
722 European cohorts. *Addiction* **111**, 1059-1068, doi:10.1111/add.13298 (2016).
- 723 15 Tang, N., Wu, Y., Ma, J., Wang, B. & Yu, R. Coffee consumption and risk of lung cancer:  
724 a meta-analysis. *Lung Cancer* **67**, 17-22, doi:10.1016/j.lungcan.2009.03.012 (2010).
- 725 16 Nehlig, A. Effects of Coffee on the Gastro-Intestinal Tract: A Narrative Review and  
726 Literature Update. *Nutrients* **14**, doi:10.3390/nu14020399 (2022).
- 727 17 Butt, M. S. & Sultan, M. T. Coffee and its consumption: benefits and risks. *Crit Rev Food*  
728 *Sci Nutr* **51**, 363-373, doi:10.1080/10408390903586412 (2011).
- 729 18 Kang, J. *et al.* Increased brain volume from higher cereal and lower coffee intake:  
730 shared genetic determinants and impacts on cognition and metabolism. *Cereb Cortex*  
731 **32**, 5163-5174, doi:10.1093/cercor/bhac005 (2022).
- 732 19 Cornelis, M. C. & van Dam, R. M. Genetic determinants of liking and intake of coffee and  
733 other bitter foods and beverages. *Sci Rep* **11**, 23845, doi:10.1038/s41598-021-03153-7  
734 (2021).
- 735 20 Said, M. A., van de Vegte, Y. J., Verweij, N. & van der Harst, P. Associations of  
736 Observational and Genetically Determined Caffeine Intake With Coronary Artery

- 737 Disease and Diabetes Mellitus. *J Am Heart Assoc* **9**, e016808,  
738 doi:10.1161/JAHA.120.016808 (2020).
- 739 21 Jin, T. *et al.* Interactions of Habitual Coffee Consumption by Genetic Polymorphisms  
740 with the Risk of Prediabetes and Type 2 Diabetes Combined. *Nutrients* **12**,  
741 doi:10.3390/nu12082228 (2020).
- 742 22 Vogel, C. F. A., Van Winkle, L. S., Esser, C. & Haarmann-Stemmann, T. The aryl  
743 hydrocarbon receptor as a target of environmental stressors - Implications for pollution  
744 mediated stress and inflammatory responses. *Redox Biol* **34**, 101530,  
745 doi:10.1016/j.redox.2020.101530 (2020).
- 746 23 Matoba, N. *et al.* GWAS of 165,084 Japanese individuals identified nine loci associated  
747 with dietary habits. *Nat Hum Behav* **4**, 308-316, doi:10.1038/s41562-019-0805-1 (2020).
- 748 24 Kennedy, O. J. *et al.* Coffee Consumption and Kidney Function: A Mendelian  
749 Randomization Study. *Am J Kidney Dis* **75**, 753-761, doi:10.1053/j.ajkd.2019.08.025  
750 (2020).
- 751 25 Jia, H. *et al.* GWAS of habitual coffee consumption reveals a sex difference in the  
752 genetic effect of the 12q24 locus in the Japanese population. *BMC Genet* **20**, 61,  
753 doi:10.1186/s12863-019-0763-7 (2019).
- 754 26 Zhong, V. W. *et al.* A genome-wide association study of bitter and sweet beverage  
755 consumption. *Hum Mol Genet* **28**, 2449-2457, doi:10.1093/hmg/ddz061 (2019).
- 756 27 Nakagawa-Senda, H. *et al.* A genome-wide association study in the Japanese  
757 population identifies the 12q24 locus for habitual coffee consumption: The J-MICC  
758 Study. *Sci Rep* **8**, 1493, doi:10.1038/s41598-018-19914-w (2018).
- 759 28 Cornelis, M. C. *et al.* Genome-wide association study of caffeine metabolites provides  
760 new insights to caffeine metabolism and dietary caffeine-consumption behavior. *Hum*  
761 *Mol Genet* **25**, 5472-5482, doi:10.1093/hmg/ddw334 (2016).

- 762 29 Pirastu, N. *et al.* Non-additive genome-wide association scan reveals a new gene  
763 associated with habitual coffee consumption. *Sci Rep* **6**, 31590, doi:10.1038/srep31590  
764 (2016).
- 765 30 Coffee and Caffeine Genetics Consortium *et al.* Genome-wide meta-analysis identifies  
766 six novel loci associated with habitual coffee consumption. *Mol Psychiatry* **20**, 647-656,  
767 doi:10.1038/mp.2014.107 (2015).
- 768 31 Hamza, T. H. *et al.* Genome-wide gene-environment study identifies glutamate receptor  
769 gene GRIN2A as a Parkinson's disease modifier gene via interaction with coffee. *PLoS*  
770 *Genet* **7**, e1002237, doi:10.1371/journal.pgen.1002237 (2011).
- 771 32 Amin, N. *et al.* Genome-wide association analysis of coffee drinking suggests  
772 association with CYP1A1/CYP1A2 and NRCAM. *Mol Psychiatry* **17**, 1116-1129,  
773 doi:10.1038/mp.2011.101 (2012).
- 774 33 Sulem, P. *et al.* Sequence variants at CYP1A1-CYP1A2 and AHR associate with coffee  
775 consumption. *Hum Mol Genet* **20**, 2071-2077, doi:10.1093/hmg/ddr086 (2011).
- 776 34 Yang, A., Palmer, A. A. & de Wit, H. Genetics of caffeine consumption and responses to  
777 caffeine. *Psychopharmacology (Berl)* **211**, 245-257, doi:10.1007/s00213-010-1900-1  
778 (2010).
- 779 35 Raja, A. M. *et al.* Genetic Susceptibility to Chronic Liver Disease in Individuals from  
780 Pakistan. *Int J Mol Sci* **21**, doi:10.3390/ijms21103558 (2020).
- 781 36 Gao, H. *et al.* Association of GCKR Gene Polymorphisms with the Risk of Nonalcoholic  
782 Fatty Liver Disease and Coronary Artery Disease in a Chinese Northern Han Population.  
783 *J Clin Transl Hepatol* **7**, 297-303, doi:10.14218/JCTH.2019.00030 (2019).
- 784 37 Cai, W. *et al.* Genetic polymorphisms associated with nonalcoholic fatty liver disease in  
785 Uyghur population: a case-control study and meta-analysis. *Lipids Health Dis* **18**, 14,  
786 doi:10.1186/s12944-018-0877-3 (2019).

- 787 38 Xiao, X. *et al.* Functional POR A503V is associated with the risk of bladder cancer in a  
788 Chinese population. *Sci Rep* **5**, 11751, doi:10.1038/srep11751 (2015).
- 789 39 Menashe, I. *et al.* Large-scale pathway-based analysis of bladder cancer genome-wide  
790 association data from five studies of European background. *PLoS One* **7**, e29396,  
791 doi:10.1371/journal.pone.0029396 (2012).
- 792 40 Rotunno, M. *et al.* Phase I metabolic genes and risk of lung cancer: multiple  
793 polymorphisms and mRNA expression. *PLoS One* **4**, e5652,  
794 doi:10.1371/journal.pone.0005652 (2009).
- 795 41 Aldrich, M. C. *et al.* CYP1A1/2 haplotypes and lung cancer and assessment of  
796 confounding by population stratification. *Cancer Res* **69**, 2340-2348, doi:10.1158/0008-  
797 5472.CAN-08-2576 (2009).
- 798 42 Thompson, A. *et al.* Functional validity, role, and implications of heavy alcohol  
799 consumption genetic loci. *Sci Adv* **6**, eaay5034, doi:10.1126/sciadv.aay5034 (2020).
- 800 43 Sanchez-Roige, S. *et al.* Genome-Wide Association Study Meta-Analysis of the Alcohol  
801 Use Disorders Identification Test (AUDIT) in Two Population-Based Cohorts. *Am J*  
802 *Psychiatry* **176**, 107-118, doi:10.1176/appi.ajp.2018.18040369 (2019).
- 803 44 Clarke, T. K. *et al.* Genome-wide association study of alcohol consumption and genetic  
804 overlap with other health-related traits in UK Biobank (N=112 117). *Mol Psychiatry* **22**,  
805 1376-1384, doi:10.1038/mp.2017.153 (2017).
- 806 45 Yin, B., Wang, X., Huang, T. & Jia, J. Shared Genetics and Causality Between  
807 Decaffeinated Coffee Consumption and Neuropsychiatric Diseases: A Large-Scale  
808 Genome-Wide Cross-Trait Analysis and Mendelian Randomization Analysis. *Front*  
809 *Psychiatry* **13**, 910432, doi:10.3389/fpsy.2022.910432 (2022).
- 810 46 Coffee *et al.* Genome-wide meta-analysis identifies six novel loci associated with  
811 habitual coffee consumption. *Mol Psychiatry* **20**, 647-656, doi:10.1038/mp.2014.107  
812 (2015).

- 813 47 Xu, J. *et al.* Assessing the Association between Important Dietary Habits and  
814 Osteoporosis: A Genetic Correlation and Two-Sample Mendelian Randomization Study.  
815 *Nutrients* **14**, doi:10.3390/nu14132656 (2022).
- 816 48 Qi, X. *et al.* Evaluating the Effects of Diet-Gut Microbiota Interactions on Sleep Traits  
817 Using the UK Biobank Cohort. *Nutrients* **14**, doi:10.3390/nu14061134 (2022).
- 818 49 Wang, T. *et al.* Habitual coffee consumption and genetic predisposition to obesity: gene-  
819 diet interaction analyses in three US prospective studies. *BMC Med* **15**, 97,  
820 doi:10.1186/s12916-017-0862-0 (2017).
- 821 50 Yuan, S., Daghlas, I. & Larsson, S. C. Alcohol, coffee consumption, and smoking in  
822 relation to migraine: a bidirectional Mendelian randomization study. *Pain* **163**, e342-  
823 e348, doi:10.1097/j.pain.0000000000002360 (2022).
- 824 51 Laaboub, N. *et al.* Associations Between High Plasma Methylxanthine Levels, Sleep  
825 Disorders and Polygenic Risk Scores of Caffeine Consumption or Sleep Duration in a  
826 Swiss Psychiatric Cohort. *Front Psychiatry* **12**, 756403, doi:10.3389/fpsyt.2021.756403  
827 (2021).
- 828 52 Song, M. Y. & Park, S. Association of Polygenetic Risk Scores Related to Immunity and  
829 Inflammation with Hyperthyroidism Risk and Interactions between the Polygenetic  
830 Scores and Dietary Factors in a Large Cohort. *J Thyroid Res* **2021**, 7664641,  
831 doi:10.1155/2021/7664641 (2021).
- 832 53 Kim, E. J. *et al.* Coffee Consumption and Incident Tachyarrhythmias: Reported Behavior,  
833 Mendelian Randomization, and Their Interactions. *JAMA Intern Med* **181**, 1185-1193,  
834 doi:10.1001/jamainternmed.2021.3616 (2021).
- 835 54 Ellison-Barnes, A., Johnson, S. & Gudzone, K. Trends in Obesity Prevalence Among  
836 Adults Aged 18 Through 25 Years, 1976-2018. *JAMA* **326**, 2073-2074,  
837 doi:10.1001/jama.2021.16685 (2021).



- 838 55 Cole, J. B., Florez, J. C. & Hirschhorn, J. N. Comprehensive genomic analysis of dietary  
839 habits in UK Biobank identifies hundreds of genetic associations. *Nat Commun* **11**, 1467,  
840 doi:10.1038/s41467-020-15193-0 (2020).
- 841 56 Zhou, H. *et al.* Genome-wide meta-analysis of problematic alcohol use in 435,563  
842 individuals yields insights into biology and relationships with other traits. *Nat Neurosci*  
843 **23**, 809-818, doi:10.1038/s41593-020-0643-5 (2020).
- 844 57 Liu, M. *et al.* Association studies of up to 1.2 million individuals yield new insights into  
845 the genetic etiology of tobacco and alcohol use. *Nat Genet* **51**, 237-244,  
846 doi:10.1038/s41588-018-0307-5 (2019).
- 847 58 Pardini, A. F. *et al.* Pharmacogenomic Variants and Drug Interactions Identified  
848 Through the Genetic Analysis of Clozapine Metabolism. *Am J Psychiatry* **176**, 477-486,  
849 doi:10.1176/appi.ajp.2019.18050589 (2019).
- 850 59 Liu, H. *et al.* Epigenomic and transcriptomic analyses define core cell types, genes and  
851 targetable mechanisms for kidney disease. *Nat Genet* **54**, 950-962, doi:10.1038/s41588-  
852 022-01097-w (2022).
- 853 60 Stanzick, K. J. *et al.* Discovery and prioritization of variants and genes for kidney  
854 function in >1.2 million individuals. *Nat Commun* **12**, 4350, doi:10.1038/s41467-021-  
855 24491-0 (2021).
- 856 61 Hellwege, J. N. *et al.* Mapping eGFR loci to the renal transcriptome and phenome in the  
857 VA Million Veteran Program. *Nat Commun* **10**, 3842, doi:10.1038/s41467-019-11704-w  
858 (2019).
- 859 62 Wuttke, M. *et al.* A catalog of genetic loci associated with kidney function from analyses  
860 of a million individuals. *Nat Genet* **51**, 957-972, doi:10.1038/s41588-019-0407-x (2019).
- 861 63 Yin, X. *et al.* Genome-wide association studies of metabolites in Finnish men identify  
862 disease-relevant loci. *Nat Commun* **13**, 1644, doi:10.1038/s41467-022-29143-5 (2022).

- 863 64 Casanova, F. *et al.* A genome-wide association study implicates multiple mechanisms  
864 influencing raised urinary albumin-creatinine ratio. *Hum Mol Genet* **28**, 4197-4207,  
865 doi:10.1093/hmg/ddz243 (2019).
- 866 65 Tin, A. *et al.* Target genes, variants, tissues and transcriptional pathways influencing  
867 human serum urate levels. *Nat Genet* **51**, 1459-1474, doi:10.1038/s41588-019-0504-x  
868 (2019).
- 869 66 Pazoki, R. *et al.* GWAS for urinary sodium and potassium excretion highlights pathways  
870 shared with cardiovascular traits. *Nat Commun* **10**, 3653, doi:10.1038/s41467-019-  
871 11451-y (2019).
- 872 67 Zanetti, D. *et al.* Identification of 22 novel loci associated with urinary biomarkers of  
873 albumin, sodium, and potassium excretion. *Kidney Int* **95**, 1197-1208,  
874 doi:10.1016/j.kint.2018.12.017 (2019).
- 875 68 Haas, M. E. *et al.* Genetic Association of Albuminuria with Cardiometabolic Disease and  
876 Blood Pressure. *Am J Hum Genet* **103**, 461-473, doi:10.1016/j.ajhg.2018.08.004 (2018).
- 877 69 Jimenez, A., Adisa, A., Woodham, C. & Saleh, M. Determination of polycyclic aromatic  
878 hydrocarbons in roasted coffee. *J Environ Sci Health B* **49**, 828-835,  
879 doi:10.1080/03601234.2014.938552 (2014).
- 880 70 Teumer, A. *et al.* Genome-wide association meta-analyses and fine-mapping elucidate  
881 pathways influencing albuminuria. *Nat Commun* **10**, 4130, doi:10.1038/s41467-019-  
882 11576-0 (2019).
- 883 71 Fredholm, B. B., Chen, J. F., Masino, S. A. & Vaugeois, J. M. Actions of adenosine at its  
884 receptors in the CNS: insights from knockouts and drugs. *Annu Rev Pharmacol Toxicol*  
885 **45**, 385-412, doi:10.1146/annurev.pharmtox.45.120403.095731 (2005).
- 886 72 Tanner, J. A. & Tyndale, R. F. Variation in CYP2A6 Activity and Personalized Medicine.  
887 *J Pers Med* **7**, doi:10.3390/jpm7040018 (2017).

- 888 73 Saunders, G. R. B. *et al.* Genetic diversity fuels gene discovery for tobacco and alcohol  
889 use. *Nature* **612**, 720-724, doi:10.1038/s41586-022-05477-4 (2022).
- 890 74 Sakaue, S. *et al.* A cross-population atlas of genetic associations for 220 human  
891 phenotypes. *Nat Genet* **53**, 1415-1424, doi:10.1038/s41588-021-00931-x (2021).
- 892 75 Koskeridis, F. *et al.* Pleiotropic genetic architecture and novel loci for C-reactive protein  
893 levels. *Nat Commun* **13**, 6939, doi:10.1038/s41467-022-34688-6 (2022).
- 894 76 Deak, J. D. *et al.* Genome-wide association study in individuals of European and African  
895 ancestry and multi-trait analysis of opioid use disorder identifies 19 independent  
896 genome-wide significant risk loci. *Mol Psychiatry* **27**, 3970-3979, doi:10.1038/s41380-  
897 022-01709-1 (2022).
- 898 77 Pasman, J. A. *et al.* Genetic Risk for Smoking: Disentangling Interplay Between Genes  
899 and Socioeconomic Status. *Behav Genet* **52**, 92-107, doi:10.1007/s10519-021-10094-4  
900 (2022).
- 901 78 Xu, K. *et al.* Genome-wide association study of smoking trajectory and meta-analysis of  
902 smoking status in 842,000 individuals. *Nat Commun* **11**, 5302, doi:10.1038/s41467-020-  
903 18489-3 (2020).
- 904 79 Pasman, J. A. *et al.* GWAS of lifetime cannabis use reveals new risk loci, genetic  
905 overlap with psychiatric traits, and a causal influence of schizophrenia. *Nat Neurosci* **21**,  
906 1161-1170, doi:10.1038/s41593-018-0206-1 (2018).
- 907 80 Schumann, G. *et al.* KLB is associated with alcohol drinking, and its gene product beta-  
908 Klotho is necessary for FGF21 regulation of alcohol preference. *Proc Natl Acad Sci U S*  
909 *A* **113**, 14372-14377, doi:10.1073/pnas.1611243113 (2016).
- 910 81 Stringer, S. *et al.* Genome-wide association study of lifetime cannabis use based on a  
911 large meta-analytic sample of 32 330 subjects from the International Cannabis  
912 Consortium. *Transl Psychiatry* **6**, e769, doi:10.1038/tp.2016.36 (2016).

- 913 82 Wain, L. V. *et al.* Novel insights into the genetics of smoking behaviour, lung function,  
914 and chronic obstructive pulmonary disease (UK BiLEVE): a genetic association study in  
915 UK Biobank. *Lancet Respir Med* **3**, 769-781, doi:10.1016/S2213-2600(15)00283-0  
916 (2015).
- 917 83 King, C. P. *et al.* Cdh13 and AdipoQ gene knockout alter instrumental and Pavlovian  
918 drug conditioning. *Genes Brain Behav* **16**, 686-698, doi:10.1111/gbb.12382 (2017).
- 919 84 Drgonova, J. *et al.* Cadherin 13: human cis-regulation and selectively-altered addiction  
920 phenotypes and cerebral cortical dopamine in knockout mice. *Mol Med* **22**, 537-547,  
921 doi:10.2119/molmed.2015.00170 (2016).
- 922 85 Yang, J. *et al.* The contribution of rare and common variants in 30 genes to risk nicotine  
923 dependence. *Mol Psychiatry* **20**, 1467-1478, doi:10.1038/mp.2014.156 (2015).
- 924 86 Weber, M. *et al.* Increased polysialic acid neural cell adhesion molecule expression in  
925 human hippocampus of heroin addicts. *Neuroscience* **138**, 1215-1223,  
926 doi:10.1016/j.neuroscience.2005.11.059 (2006).
- 927 87 Barker, J. M., Torregrossa, M. M. & Taylor, J. R. Low prefrontal PSA-NCAM confers risk  
928 for alcoholism-related behavior. *Nat Neurosci* **15**, 1356-1358, doi:10.1038/nn.3194  
929 (2012).
- 930 88 Mackowiak, M. *et al.* Cocaine decreases the expression of PSA-NCAM protein and  
931 attenuates long-term potentiation via glucocorticoid receptors in the rat dentate gyrus.  
932 *Eur J Neurosci* **27**, 2928-2937, doi:10.1111/j.1460-9568.2008.06255.x (2008).
- 933 89 Kojetin, D. J. & Burris, T. P. REV-ERB and ROR nuclear receptors as drug targets. *Nat*  
934 *Rev Drug Discov* **13**, 197-216, doi:10.1038/nrd4100 (2014).
- 935 90 Lee, J. J. *et al.* Gene discovery and polygenic prediction from a genome-wide  
936 association study of educational attainment in 1.1 million individuals. *Nat Genet* **50**,  
937 1112-1121, doi:10.1038/s41588-018-0147-3 (2018).

- 938 91 Chen, M. H. *et al.* Trans-ethnic and Ancestry-Specific Blood-Cell Genetics in 746,667  
939 Individuals from 5 Global Populations. *Cell* **182**, 1198-1213 e1114,  
940 doi:10.1016/j.cell.2020.06.045 (2020).
- 941 92 Thompson, A., King, K., Morris, A. P. & Pirmohamed, M. Assessing the impact of alcohol  
942 consumption on the genetic contribution to mean corpuscular volume. *Hum Mol Genet*  
943 **30**, 2040-2051, doi:10.1093/hmg/ddab147 (2021).
- 944 93 Willer, C. J., Li, Y. & Abecasis, G. R. METAL: fast and efficient meta-analysis of  
945 genomewide association scans. *Bioinformatics* **26**, 2190-2191,  
946 doi:10.1093/bioinformatics/btq340 (2010).
- 947 94 Zhu, Z. *et al.* Causal associations between risk factors and common diseases inferred  
948 from GWAS summary data. *Nat Commun* **9**, 224, doi:10.1038/s41467-017-02317-2  
949 (2018).
- 950 95 Kendler, K. S., Schmitt, E., Aggen, S. H. & Prescott, C. A. Genetic and environmental  
951 influences on alcohol, caffeine, cannabis, and nicotine use from early adolescence to  
952 middle adulthood. *Arch Gen Psychiatry* **65**, 674-682, doi:10.1001/archpsyc.65.6.674  
953 (2008).
- 954 96 Karlsson Linner, R. *et al.* Multivariate analysis of 1.5 million people identifies genetic  
955 associations with traits related to self-regulation and addiction. *Nat Neurosci* **24**, 1367-  
956 1376, doi:10.1038/s41593-021-00908-3 (2021).
- 957 97 Wojcik, G. L. *et al.* Genetic analyses of diverse populations improves discovery for  
958 complex traits. *Nature* **570**, 514-518, doi:10.1038/s41586-019-1310-4 (2019).
- 959 98 Vuckovic, D. *et al.* The Polygenic and Monogenic Basis of Blood Traits and Diseases.  
960 *Cell* **182**, 1214-1231 e1211, doi:10.1016/j.cell.2020.08.008 (2020).
- 961 99 Klarin, D. *et al.* Genetics of blood lipids among ~300,000 multi-ethnic participants of the  
962 Million Veteran Program. *Nat Genet* **50**, 1514-1523, doi:10.1038/s41588-018-0222-9  
963 (2018).

- 964 100 Feitosa, M. F. *et al.* Novel genetic associations for blood pressure identified via gene-  
965 alcohol interaction in up to 570K individuals across multiple ancestries. *PLoS One* **13**,  
966 e0198166, doi:10.1371/journal.pone.0198166 (2018).
- 967 101 Sung, Y. J. *et al.* A Large-Scale Multi-ancestry Genome-wide Study Accounting for  
968 Smoking Behavior Identifies Multiple Significant Loci for Blood Pressure. *Am J Hum*  
969 *Genet* **102**, 375-400, doi:10.1016/j.ajhg.2018.01.015 (2018).
- 970 102 Astle, W. J. *et al.* The Allelic Landscape of Human Blood Cell Trait Variation and Links to  
971 Common Complex Disease. *Cell* **167**, 1415-1429 e1419, doi:10.1016/j.cell.2016.10.042  
972 (2016).
- 973 103 Meeks, K. A. C. *et al.* Genome-wide analyses of multiple obesity-related cytokines and  
974 hormones informs biology of cardiometabolic traits. *Genome Med* **13**, 156,  
975 doi:10.1186/s13073-021-00971-2 (2021).
- 976 104 German, C. A., Sinsheimer, J. S., Klimentidis, Y. C., Zhou, H. & Zhou, J. J. Ordered  
977 multinomial regression for genetic association analysis of ordinal phenotypes at Biobank  
978 scale. *Genet Epidemiol* **44**, 248-260, doi:10.1002/gepi.22276 (2020).
- 979 105 Pham, K. *et al.* High coffee consumption, brain volume and risk of dementia and stroke.  
980 *Nutr Neurosci* **25**, 2111-2122, doi:10.1080/1028415X.2021.1945858 (2022).
- 981 106 Haller, S., Montandon, M. L., Rodriguez, C., Herrmann, F. R. & Giannakopoulos, P.  
982 Impact of Coffee, Wine, and Chocolate Consumption on Cognitive Outcome and MRI  
983 Parameters in Old Age. *Nutrients* **10**, doi:10.3390/nu10101391 (2018).
- 984 107 Araujo, L. F. *et al.* Association of Coffee Consumption with MRI Markers and Cognitive  
985 Function: A Population-Based Study. *J Alzheimers Dis* **53**, 451-461, doi:10.3233/JAD-  
986 160116 (2016).
- 987 108 Perlaki, G. *et al.* Coffee consumption may influence hippocampal volume in young  
988 women. *Brain Imaging Behav* **5**, 274-284, doi:10.1007/s11682-011-9131-6 (2011).

- 989 109 Magalhaes, R. *et al.* Habitual coffee drinkers display a distinct pattern of brain functional  
990 connectivity. *Mol Psychiatry* **26**, 6589-6598, doi:10.1038/s41380-021-01075-4 (2021).
- 991 110 Laurienti, P. J. *et al.* Dietary caffeine consumption modulates fMRI measures.  
992 *Neuroimage* **17**, 751-757 (2002).
- 993 111 Deak, J. D. & Johnson, E. C. Genetics of substance use disorders: a review. *Psychol*  
994 *Med* **51**, 2189-2200, doi:10.1017/S0033291721000969 (2021).
- 995 112 Vanyukov, M. M. *et al.* Common liability to addiction and "gateway hypothesis":  
996 theoretical, empirical and evolutionary perspective. *Drug Alcohol Depend* **123 Suppl 1**,  
997 S3-17, doi:10.1016/j.drugalcdep.2011.12.018 (2012).
- 998 113 Chang, L. H. *et al.* Investigating the genetic and causal relationship between initiation or  
999 use of alcohol, caffeine, cannabis and nicotine. *Drug Alcohol Depend* **210**, 107966,  
1000 doi:10.1016/j.drugalcdep.2020.107966 (2020).
- 1001 114 Hettema, J. M., Corey, L. A. & Kendler, K. S. A multivariate genetic analysis of the use of  
1002 tobacco, alcohol, and caffeine in a population based sample of male and female twins.  
1003 *Drug Alcohol Depend* **57**, 69-78, doi:10.1016/s0376-8716(99)00053-8 (1999).
- 1004 115 Swan, G. E., Carmelli, D. & Cardon, L. R. The consumption of tobacco, alcohol, and  
1005 coffee in Caucasian male twins: a multivariate genetic analysis. *J Subst Abuse* **8**, 19-31,  
1006 doi:10.1016/s0899-3289(96)90055-3 (1996).
- 1007 116 Mallard, T. T. & Sanchez-Roige, S. Dimensional Phenotypes in Psychiatric Genetics:  
1008 Lessons from Genome-Wide Association Studies of Alcohol Use Phenotypes. *Complex*  
1009 *Psychiatry* **7**, 45-48, doi:10.1159/000518863 (2021).
- 1010 117 Gelernter, J. & Polimanti, R. Genetics of substance use disorders in the era of big data.  
1011 *Nat Rev Genet* **22**, 712-729, doi:10.1038/s41576-021-00377-1 (2021).
- 1012 118 Johnson, E. C. *et al.* A large-scale genome-wide association study meta-analysis of  
1013 cannabis use disorder. *Lancet Psychiatry* **7**, 1032-1045, doi:10.1016/S2215-  
1014 0366(20)30339-4 (2020).

- 1015 119 Sanchez-Roige, S., Palmer, A. A. & Clarke, T. K. Recent Efforts to Dissect the Genetic  
1016 Basis of Alcohol Use and Abuse. *Biol Psychiatry* **87**, 609-618,  
1017 doi:10.1016/j.biopsych.2019.09.011 (2020).
- 1018 120 Ramli, N. N. S., Alkhalidy, A. A. & Mhd Jalil, A. M. Effects of Caffeinated and  
1019 Decaffeinated Coffee Consumption on Metabolic Syndrome Parameters: A Systematic  
1020 Review and Meta-Analysis of Data from Randomised Controlled Trials. *Medicina*  
1021 *(Kaunas)* **57**, doi:10.3390/medicina57090957 (2021).
- 1022 121 Lee, A. *et al.* Coffee Intake and Obesity: A Meta-Analysis. *Nutrients* **11**,  
1023 doi:10.3390/nu11061274 (2019).
- 1024 122 Ludwig, I. A. *et al.* Variations in caffeine and chlorogenic acid contents of coffees: what  
1025 are we drinking? *Food Funct* **5**, 1718-1726, doi:10.1039/c4fo00290c (2014).
- 1026 123 Schwartz, A. & Bellissimo, N. Nicotine and energy balance: A review examining the  
1027 effect of nicotine on hormonal appetite regulation and energy expenditure. *Appetite* **164**,  
1028 105260, doi:10.1016/j.appet.2021.105260 (2021).
- 1029 124 Schubert, M. M. *et al.* Caffeine, coffee, and appetite control: a review. *Int J Food Sci Nutr*  
1030 **68**, 901-912, doi:10.1080/09637486.2017.1320537 (2017).
- 1031 125 Cornelis, M. C., Bennett, D. A., Weintraub, S., Schneider, J. A. & Morris, M. C. Caffeine  
1032 Consumption and Dementia: Are Lewy Bodies the Link? *Ann Neurol* **91**, 834-846,  
1033 doi:10.1002/ana.26349 (2022).
- 1034 126 Di Maso, M., Boffetta, P., Negri, E., La Vecchia, C. & Bravi, F. Caffeinated Coffee  
1035 Consumption and Health Outcomes in the US Population: A Dose-Response Meta-  
1036 Analysis and Estimation of Disease Cases and Deaths Avoided. *Adv Nutr* **12**, 1160-  
1037 1176, doi:10.1093/advances/nmaa177 (2021).
- 1038 127 Mentis, A. A., Dardiotis, E., Efthymiou, V. & Chrousos, G. P. Non-genetic risk and  
1039 protective factors and biomarkers for neurological disorders: a meta-umbrella systematic  
1040 review of umbrella reviews. *BMC Med* **19**, 6, doi:10.1186/s12916-020-01873-7 (2021).



- 1041 128 Chen, X., Zhao, Y., Tao, Z. & Wang, K. Coffee consumption and risk of prostate cancer:  
1042 a systematic review and meta-analysis. *BMJ Open* **11**, e038902, doi:10.1136/bmjopen-  
1043 2020-038902 (2021).
- 1044 129 Hong, C. T., Chan, L. & Bai, C. H. The Effect of Caffeine on the Risk and Progression of  
1045 Parkinson's Disease: A Meta-Analysis. *Nutrients* **12**, doi:10.3390/nu12061860 (2020).
- 1046 130 Sartini, M. *et al.* Coffee Consumption and Risk of Colorectal Cancer: A Systematic  
1047 Review and Meta-Analysis of Prospective Studies. *Nutrients* **11**,  
1048 doi:10.3390/nu11030694 (2019).
- 1049 131 Lofffield, E. *et al.* Association of Coffee Drinking With Mortality by Genetic Variation in  
1050 Caffeine Metabolism: Findings From the UK Biobank. *JAMA Intern Med* **178**, 1086-1097,  
1051 doi:10.1001/jamainternmed.2018.2425 (2018).
- 1052 132 Wu, L., Sun, D. & He, Y. Coffee intake and the incident risk of cognitive disorders: A  
1053 dose-response meta-analysis of nine prospective cohort studies. *Clin Nutr* **36**, 730-736,  
1054 doi:10.1016/j.clnu.2016.05.015 (2017).
- 1055 133 Liu, Q. P. *et al.* Habitual coffee consumption and risk of cognitive decline/dementia: A  
1056 systematic review and meta-analysis of prospective cohort studies. *Nutrition* **32**, 628-  
1057 636, doi:10.1016/j.nut.2015.11.015 (2016).
- 1058 134 Kennedy, O. J. *et al.* Systematic review with meta-analysis: coffee consumption and the  
1059 risk of cirrhosis. *Aliment Pharmacol Ther* **43**, 562-574, doi:10.1111/apt.13523 (2016).
- 1060 135 Crippa, A., Discacciati, A., Larsson, S. C., Wolk, A. & Orsini, N. Coffee consumption and  
1061 mortality from all causes, cardiovascular disease, and cancer: a dose-response meta-  
1062 analysis. *Am J Epidemiol* **180**, 763-775, doi:10.1093/aje/kwu194 (2014).
- 1063 136 Ding, M., Bhupathiraju, S. N., Satija, A., van Dam, R. M. & Hu, F. B. Long-term coffee  
1064 consumption and risk of cardiovascular disease: a systematic review and a dose-  
1065 response meta-analysis of prospective cohort studies. *Circulation* **129**, 643-659,  
1066 doi:10.1161/CIRCULATIONAHA.113.005925 (2014).

- 1067 137 Abalo, R. Coffee and Caffeine Consumption for Human Health. *Nutrients* **13**,  
1068 doi:10.3390/nu13092918 (2021).
- 1069 138 Hou, C. *et al.* Medical conditions associated with coffee consumption: Disease-trajectory  
1070 and comorbidity network analyses of a prospective cohort study in UK Biobank. *Am J*  
1071 *Clin Nutr* **116**, 730-740, doi:10.1093/ajcn/nqac148 (2022).
- 1072 139 Paz-Graniel, I. *et al.* Association between coffee consumption and total dietary caffeine  
1073 intake with cognitive functioning: cross-sectional assessment in an elderly  
1074 Mediterranean population. *Eur J Nutr* **60**, 2381-2396, doi:10.1007/s00394-020-02415-w  
1075 (2021).
- 1076 140 Dong, X., Li, S., Sun, J., Li, Y. & Zhang, D. Association of Coffee, Decaffeinated Coffee  
1077 and Caffeine Intake from Coffee with Cognitive Performance in Older Adults: National  
1078 Health and Nutrition Examination Survey (NHANES) 2011-2014. *Nutrients* **12**,  
1079 doi:10.3390/nu12030840 (2020).
- 1080 141 Haskell-Ramsay, C. F. *et al.* The Acute Effects of Caffeinated Black Coffee on Cognition  
1081 and Mood in Healthy Young and Older Adults. *Nutrients* **10**, doi:10.3390/nu10101386  
1082 (2018).
- 1083 142 Johnson-Kozlow, M., Kritz-Silverstein, D., Barrett-Connor, E. & Morton, D. Coffee  
1084 consumption and cognitive function among older adults. *Am J Epidemiol* **156**, 842-850,  
1085 doi:10.1093/aje/kwf119 (2002).
- 1086 143 Kim, Y., Je, Y. & Giovannucci, E. Coffee consumption and all-cause and cause-specific  
1087 mortality: a meta-analysis by potential modifiers. *Eur J Epidemiol* **34**, 731-752,  
1088 doi:10.1007/s10654-019-00524-3 (2019).
- 1089 144 Abdellaoui, A., Dolan, C. V., Verweij, K. J. H. & Nivard, M. G. Gene-environment  
1090 correlations across geographic regions affect genome-wide association studies. *Nat*  
1091 *Genet* **54**, 1345-1354, doi:10.1038/s41588-022-01158-0 (2022).

- 1092 145 De Toni, L. *et al.* Phthalates and heavy metals as endocrine disruptors in food: A study  
1093 on pre-packed coffee products. *Toxicol Rep* **4**, 234-239,  
1094 doi:10.1016/j.toxrep.2017.05.004 (2017).
- 1095 146 Sakaki, J. R., Melough, M. M., Provasas, A. A., Perkins, C. & Chun, O. K. Evaluation of  
1096 estrogenic chemicals in capsule and French press coffee using ultra-performance liquid  
1097 chromatography with tandem mass spectrometry. *Toxicol Rep* **7**, 1020-1024,  
1098 doi:10.1016/j.toxrep.2020.08.015 (2020).
- 1099 147 Chieng, D. *et al.* The impact of coffee subtypes on incident cardiovascular disease,  
1100 arrhythmias, and mortality: long-term outcomes from the UK Biobank. *Eur J Prev Cardiol*  
1101 **29**, 2240-2249, doi:10.1093/eurjpc/zwac189 (2022).
- 1102 148 Nordestgaard, A. T. Causal relationship from coffee consumption to diseases and  
1103 mortality: a review of observational and Mendelian randomization studies including  
1104 cardiometabolic diseases, cancer, gallstones and other diseases. *Eur J Nutr* **61**, 573-  
1105 587, doi:10.1007/s00394-021-02650-9 (2022).
- 1106 149 Treur, J. L. *et al.* Smoking and caffeine consumption: a genetic analysis of their  
1107 association. *Addict Biol* **22**, 1090-1102, doi:10.1111/adb.12391 (2017).
- 1108 150 Verweij, K. J. H., Treur, J. L. & Vink, J. M. Investigating causal associations between use  
1109 of nicotine, alcohol, caffeine and cannabis: a two-sample bidirectional Mendelian  
1110 randomization study. *Addiction* **113**, 1333-1338, doi:10.1111/add.14154 (2018).
- 1111 151 Ware, J. J. *et al.* Does coffee consumption impact on heaviness of smoking? *Addiction*  
1112 **112**, 1842-1853, doi:10.1111/add.13888 (2017).
- 1113 152 Sanchez-Roige, S. & Palmer, A. A. Emerging phenotyping strategies will advance our  
1114 understanding of psychiatric genetics. *Nat Neurosci* **23**, 475-480, doi:10.1038/s41593-  
1115 020-0609-7 (2020).

- 1116 153 Jee, H. J., Lee, S. G., Bormate, K. J. & Jung, Y. S. Effect of Caffeine Consumption on  
1117 the Risk for Neurological and Psychiatric Disorders: Sex Differences in Human. *Nutrients*  
1118 **12**, doi:10.3390/nu12103080 (2020).
- 1119 154 Nehlig, A. Interindividual Differences in Caffeine Metabolism and Factors Driving  
1120 Caffeine Consumption. *Pharmacol Rev* **70**, 384-411, doi:10.1124/pr.117.014407 (2018).
- 1121 155 Sanchez-Roige, S. *et al.* CADM2 is implicated in impulsive personality traits by genome-  
1122 and phenome-wide association studies in humans, with further support from studies of  
1123 Cadm2 mutant mice. *Translational Psychiatry* **13**, 167, doi:10.1038/s41398-023-02453-y  
1124 (2023).
- 1125 156 Durand, E. Y., Do, C. B., Mountain, J. L. & Macpherson, J. M. Ancestry Composition: A  
1126 Novel, Efficient Pipeline for Ancestry Deconvolution. *bioRxiv*. doi:10.1101/010512  
1127 (2014).
- 1128 157 Hyde, C. L. *et al.* Identification of 15 genetic loci associated with risk of major depression  
1129 in individuals of European descent. *Nat Genet* **48**, 1031-1036, doi:10.1038/ng.3623  
1130 (2016).
- 1131 158 Eriksson, N. *et al.* Web-based, participant-driven studies yield novel genetic associations  
1132 for common traits. *PLoS Genet* **6**, e1000993, doi:10.1371/journal.pgen.1000993 (2010).
- 1133 159 Lam, M. *et al.* Large-Scale Cognitive GWAS Meta-Analysis Reveals Tissue-Specific  
1134 Neural Expression and Potential Nootropic Drug Targets. *Cell Rep* **21**, 2597-2613,  
1135 doi:10.1016/j.celrep.2017.11.028 (2017).
- 1136 160 Sanchez-Roige, S. *et al.* Genome-wide association study of delay discounting in 23,217  
1137 adult research participants of European ancestry. *Nat Neurosci* **21**, 16-18,  
1138 doi:10.1038/s41593-017-0032-x (2018).
- 1139 161 Sanchez-Roige, S. *et al.* Genome-wide association study of problematic opioid  
1140 prescription use in 132,113 23andMe research participants of European ancestry. *Mol*  
1141 *Psychiatry* **26**, 6209-6217, doi:10.1038/s41380-021-01335-3 (2021).

- 1142 162 Sey, N. Y. A. *et al.* A computational tool (H-MAGMA) for improved prediction of brain-  
1143 disorder risk genes by incorporating brain chromatin interaction profiles. *Nat Neurosci*  
1144 **23**, 583-593, doi:10.1038/s41593-020-0603-0 (2020).
- 1145 163 Barbeira, A. N. *et al.* Exploring the phenotypic consequences of tissue specific gene  
1146 expression variation inferred from GWAS summary statistics. *Nat Commun* **9**, 1825,  
1147 doi:10.1038/s41467-018-03621-1 (2018).
- 1148 164 Barbeira, A. N. *et al.* Integrating predicted transcriptome from multiple tissues improves  
1149 association detection. *PLoS Genet* **15**, e1007889, doi:10.1371/journal.pgen.1007889  
1150 (2019).
- 1151 165 Bulik-Sullivan, B. K. *et al.* LD Score regression distinguishes confounding from  
1152 polygenicity in genome-wide association studies. *Nat Genet* **47**, 291-295,  
1153 doi:10.1038/ng.3211 (2015).
- 1154 166 Meddens, S. F. W. *et al.* Genomic analysis of diet composition finds novel loci and  
1155 associations with health and lifestyle. *Mol Psychiatry* **26**, 2056-2069,  
1156 doi:10.1038/s41380-020-0697-5 (2021).
- 1157 167 Ge, T., Chen, C. Y., Ni, Y., Feng, Y. A. & Smoller, J. W. Polygenic prediction via  
1158 Bayesian regression and continuous shrinkage priors. *Nat Commun* **10**, 1776,  
1159 doi:10.1038/s41467-019-09718-5 (2019).
- 1160 168 Roden, D. M. *et al.* Development of a large-scale de-identified DNA biobank to enable  
1161 personalized medicine. *Clin Pharmacol Ther* **84**, 362-369, doi:10.1038/clpt.2008.89  
1162 (2008).
- 1163 169 Dennis, J. *et al.* Genetic risk for major depressive disorder and loneliness in sex-specific  
1164 associations with coronary artery disease. *Mol Psychiatry* **26**, 4254-4264,  
1165 doi:10.1038/s41380-019-0614-y (2021).

- 1166 170 Carroll, R. J., Bastarache, L. & Denny, J. C. R PheWAS: data analysis and plotting tools  
1167 for phenome-wide association studies in the R environment. *Bioinformatics* **30**, 2375-  
1168 2376, doi:10.1093/bioinformatics/btu197 (2014).
- 1169 171 Kaufman, L. & Rousseeuw, P. J. *Finding groups in data : an introduction to cluster*  
1170 *analysis*. (Wiley, 1990).
- 1171 172 Watanabe, K. *et al*. A global overview of pleiotropy and genetic architecture in complex  
1172 traits. *Nat Genet* **51**, 1339-1348, doi:10.1038/s41588-019-0481-0 (2019).
- 1173 173 Walters, R. K. *et al*. Transancestral GWAS of alcohol dependence reveals common  
1174 genetic underpinnings with psychiatric disorders. *Nat Neurosci* **21**, 1656-1669,  
1175 doi:10.1038/s41593-018-0275-1 (2018).
- 1176 174 Quach, B. C. *et al*. Expanding the genetic architecture of nicotine dependence and its  
1177 shared genetics with multiple traits. *Nat Commun* **11**, 5562, doi:10.1038/s41467-020-  
1178 19265-z (2020).
- 1179 175 Karlsson Linner, R. *et al*. Genome-wide association analyses of risk tolerance and risky  
1180 behaviors in over 1 million individuals identify hundreds of loci and shared genetic  
1181 influences. *Nat Genet* **51**, 245-257, doi:10.1038/s41588-018-0309-3 (2019).
- 1182 176 Barkley-Levenson, A. M., Lagarda, F. A. & Palmer, A. A. Glyoxalase 1 (GLO1) Inhibition  
1183 or Genetic Overexpression Does Not Alter Ethanol's Locomotor Effects: Implications for  
1184 GLO1 as a Therapeutic Target in Alcohol Use Disorders. *Alcohol Clin Exp Res* **42**, 869-  
1185 878, doi:10.1111/acer.13623 (2018).
- 1186 177 Distler, M. G. *et al*. Glyoxalase 1 increases anxiety by reducing GABAA receptor agonist  
1187 methylglyoxal. *J Clin Invest* **122**, 2306-2315, doi:10.1172/JCI61319 (2012).
- 1188 178 Dawson, G. R. & Tricklebank, M. D. Use of the elevated plus maze in the search for  
1189 novel anxiolytic agents. *Trends Pharmacol Sci* **16**, 33-36, doi:10.1016/s0165-  
1190 6147(00)88973-7 (1995).

- 1191 179 Henn, B. M. *et al.* Cryptic distant relatives are common in both isolated and  
1192 cosmopolitan genetic samples. *PLoS One* **7**, e34267, doi:10.1371/journal.pone.0034267  
1193 (2012).
- 1194 180 Fuchsberger, C., Abecasis, G. R. & Hinds, D. A. minimac2: faster genotype imputation.  
1195 *Bioinformatics* **31**, 782-784, doi:10.1093/bioinformatics/btu704 (2015).
- 1196 181 Pruim, R. J. *et al.* LocusZoom: regional visualization of genome-wide association scan  
1197 results. *Bioinformatics* **26**, 2336-2337, doi:10.1093/bioinformatics/btq419 (2010).

A)

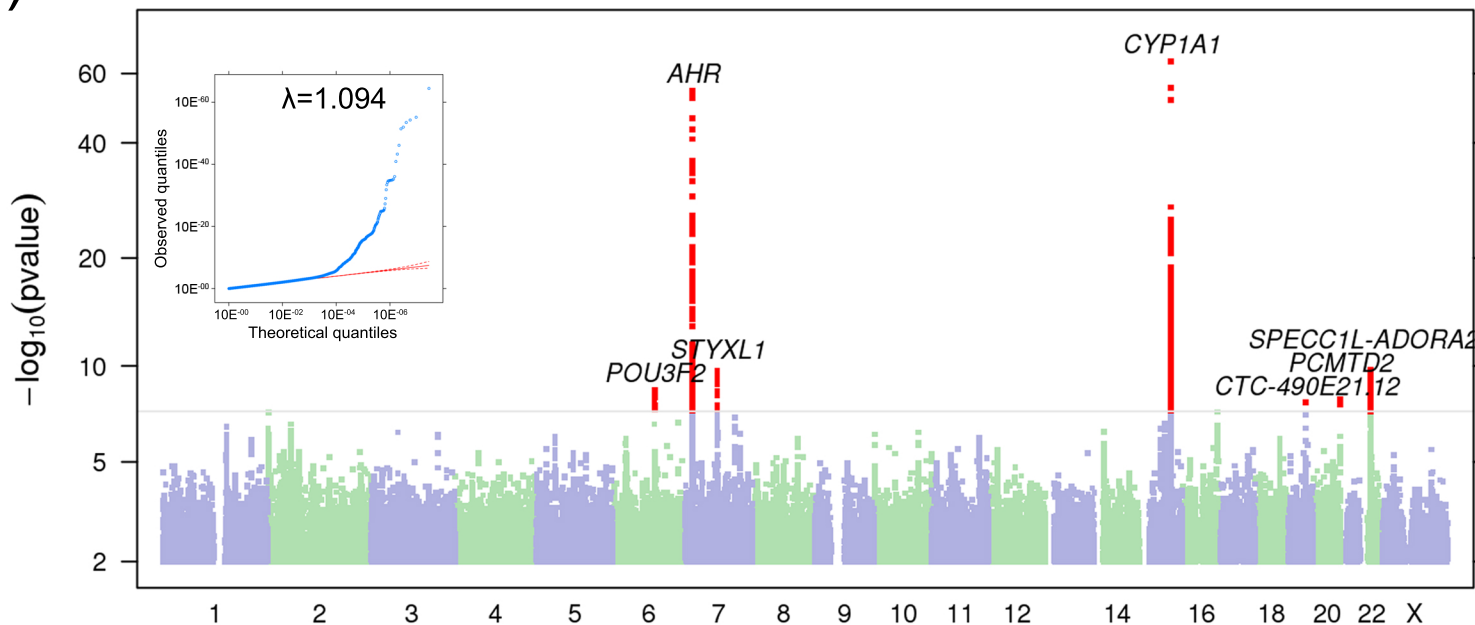

B)

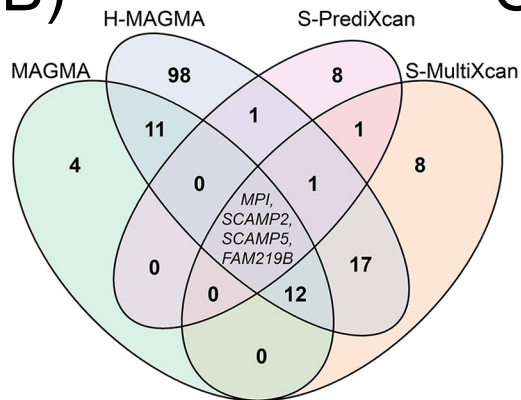

C)

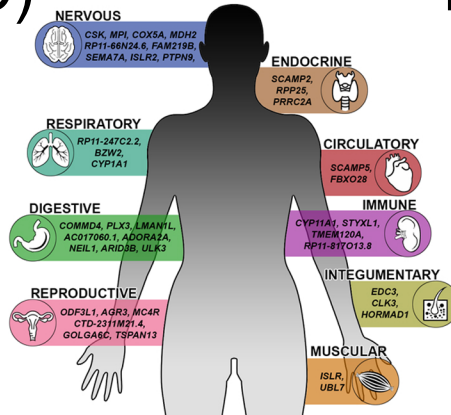

D)

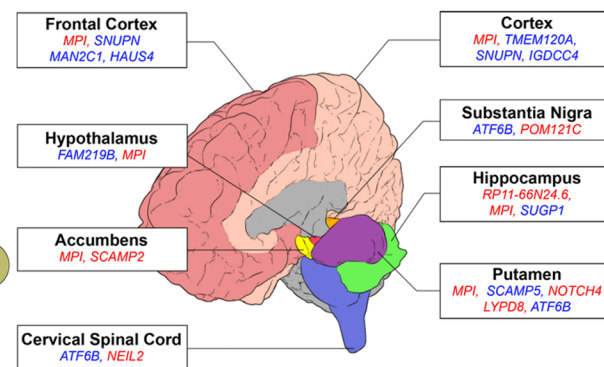



A)

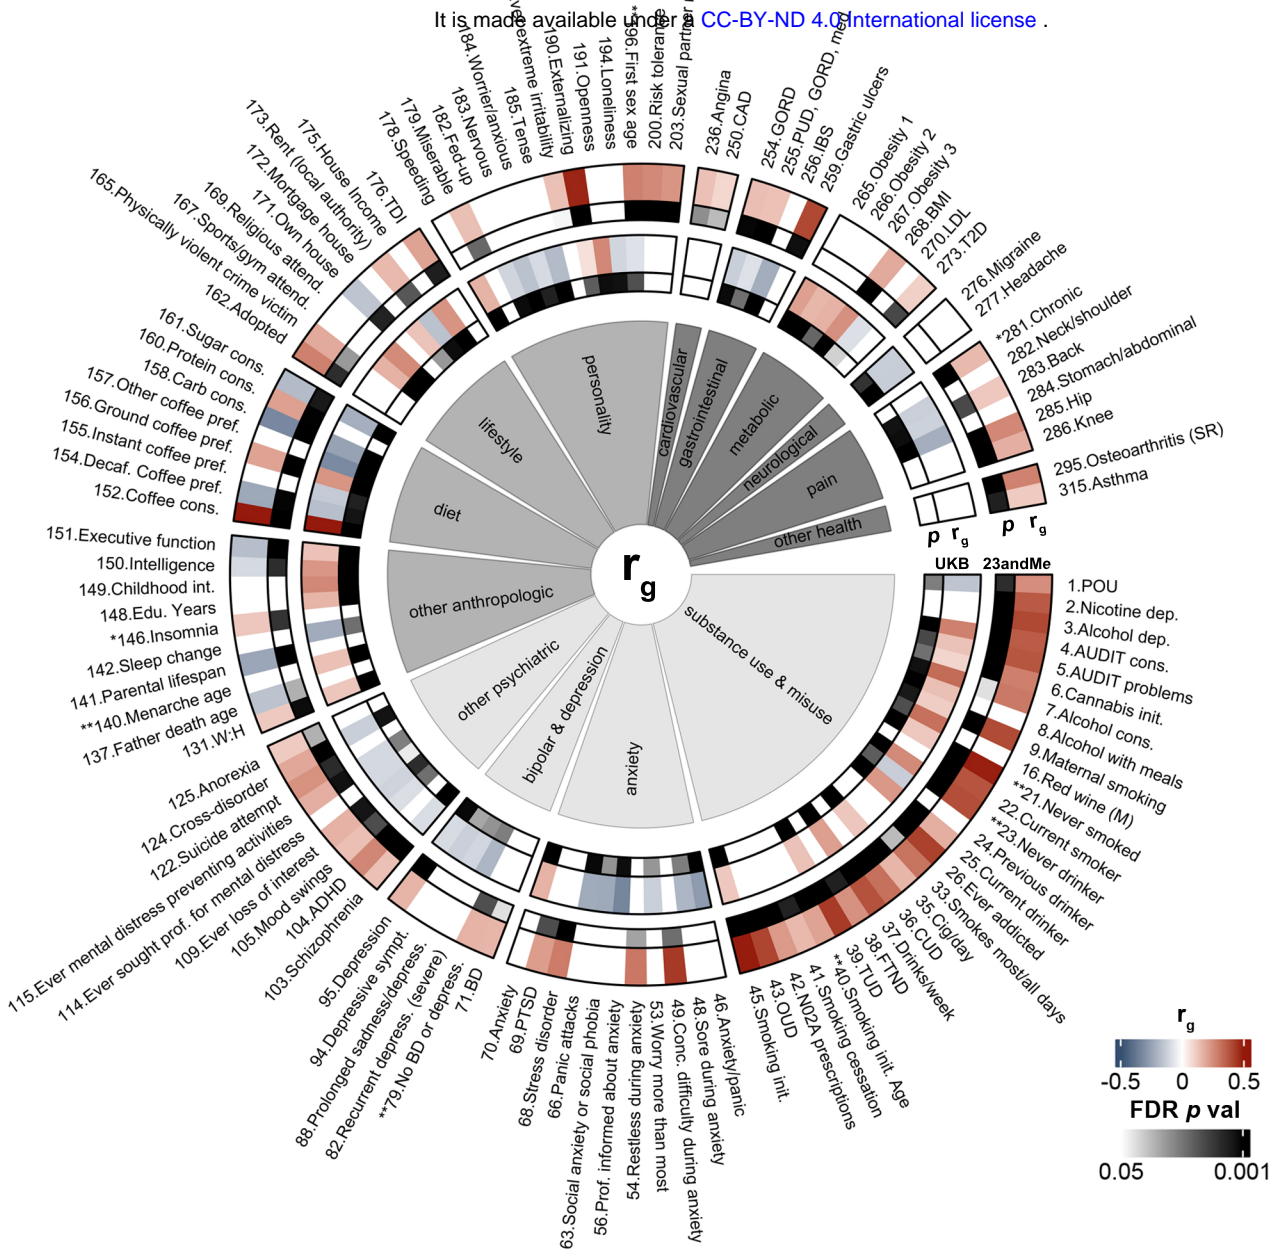

B)

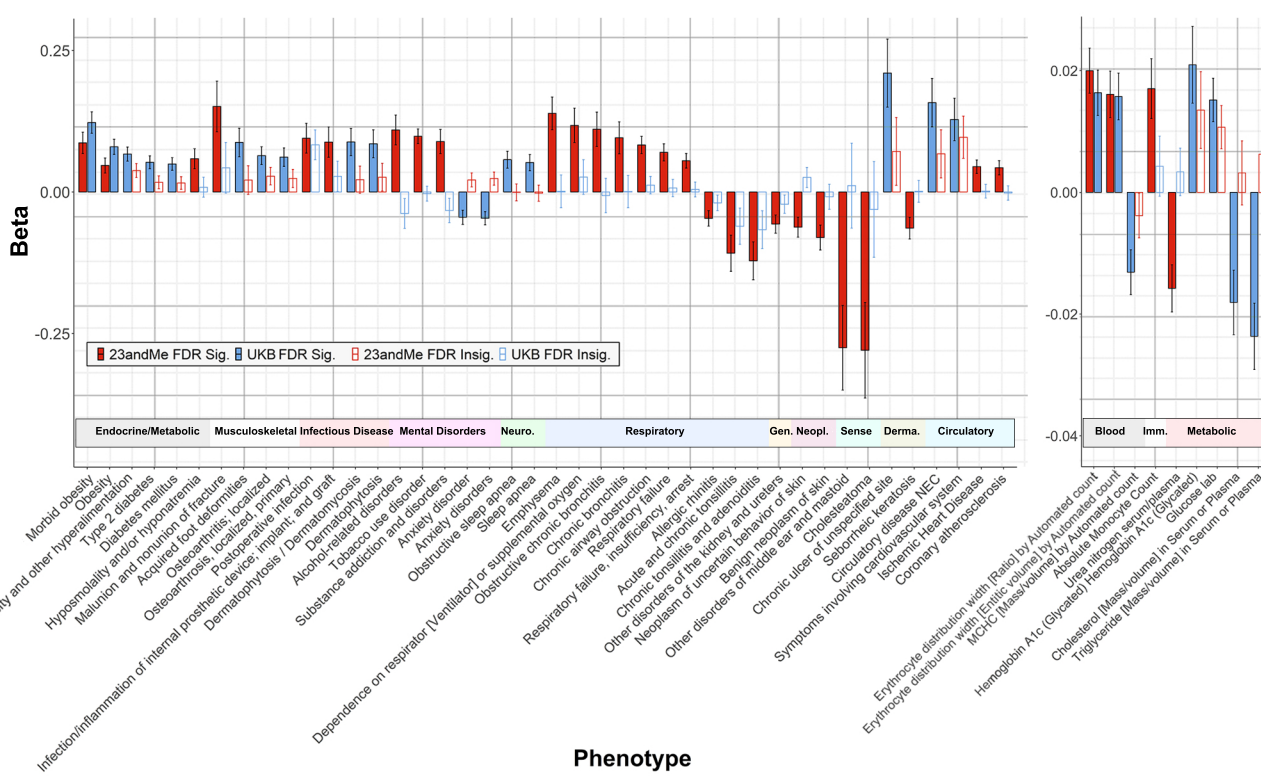

Source: https://medrxiv.org/content/10.1101/2023.09.09.23295284v1.full.pdf
